# Supplementary material for: A computational study of the activation of allenoates by Lewis bases and the reactivity of intermediate adducts
Source: Royal Society of Chemistry journal article supplement (doi:10.1039/c4ob01177e), 2014-08-11
Supplement: c4ob01177e1.pdf [file c4ob01177e1.pdf]

# Supporting Information

## A Computational Study of Activation of Allenates by Lewis Bases and Reactivity of Intermediate Adducts

Gou-Tao Huang, Timm Lankau, and Chin-Hui Yu\*

*Department of Chemistry, National Tsing Hua University, 101, Section 2, Kuang-Fu Road,  
HsinChu 30013, Taiwan*

E-mail: chyu@oxygen.chem.nthu.edu.tw

### Contents

|          |                                                                                       |           |
|----------|---------------------------------------------------------------------------------------|-----------|
| <b>1</b> | <b>Assessment of performance of M06-2X</b>                                            | <b>5</b>  |
| <b>2</b> | <b>Addition of Lewis bases to <i>s-trans</i> methyl allenate</b>                      | <b>7</b>  |
| <b>3</b> | <b>Electrostatic potential surface maps for the addition of LBs to <i>s-cis</i> 1</b> | <b>8</b>  |
| <b>4</b> | <b>Solvent effect</b>                                                                 | <b>12</b> |
| <b>5</b> | <b>Protonation and nucleophilicity</b>                                                | <b>14</b> |
| <b>6</b> | <b>[3 + 2] cycloadditions with ethylene 2a</b>                                        | <b>17</b> |

---

\*To whom correspondence should be addressed

|          |                                                                                 |           |
|----------|---------------------------------------------------------------------------------|-----------|
| <b>7</b> | <b>Cycloadditions with enone <b>2b</b></b>                                      | <b>18</b> |
| <b>8</b> | <b>Cycloadditions with ketone <b>2c</b></b>                                     | <b>22</b> |
| <b>9</b> | <b>Cartesian coordinates of optimized structures</b>                            | <b>27</b> |
| 9.1      | LBs and methyl allenoate . . . . .                                              | 27        |
| 9.2      | Addition of LBs to <i>s-cis</i> methyl allenoate . . . . .                      | 29        |
| 9.2.1    | Z-type addition . . . . .                                                       | 29        |
| 9.2.2    | E-type addition . . . . .                                                       | 32        |
| 9.3      | Proton affinity and methylation . . . . .                                       | 35        |
| 9.3.1    | Protonated Z-type adducts . . . . .                                             | 35        |
| 9.3.2    | Transition structures for the attack of the Z-type adducts on MeCl . . . . .    | 38        |
| 9.4      | [3 + 2] cycloaddition with ethylene <b>2a</b> . . . . .                         | 41        |
| 9.5      | [3 + 2] and [2 + 4] cycloadditions with enone <b>2b</b> . . . . .               | 44        |
| 9.5.1    | Cycloadditions starting from <b>Pph-3</b> . . . . .                             | 44        |
| 9.5.2    | Cycloadditions starting from <b>Dabco-3'</b> . . . . .                          | 46        |
| 9.6      | [2 + 2], [3 + 2] and [2 + 2 + 2] cycloadditions with ketone <b>2c</b> . . . . . | 47        |
| 9.6.1    | Cycloadditions starting from <b>IPr-3'</b> . . . . .                            | 47        |
| 9.6.2    | Cycloadditions starting from <b>Dabco-3'</b> . . . . .                          | 51        |
| 9.6.3    | Cycloadditions starting from <b>Pph-3</b> . . . . .                             | 53        |

## List of Figures

|    |                                                                                                                                                                                                                                |   |
|----|--------------------------------------------------------------------------------------------------------------------------------------------------------------------------------------------------------------------------------|---|
| S1 | Evaluation of the M06-2X and CCSD(T) methods for the addition of $\text{PMe}_3$ to methyl allenoate. The electronic energies, $\Delta E_{\text{ele}}$ in $\text{kcal mol}^{-1}$ , are relative to separated reactants. . . . . | 5 |
|----|--------------------------------------------------------------------------------------------------------------------------------------------------------------------------------------------------------------------------------|---|

|     |                                                                                                                                                                                                                                                                                                           |    |
|-----|-----------------------------------------------------------------------------------------------------------------------------------------------------------------------------------------------------------------------------------------------------------------------------------------------------------|----|
| S2  | Addition of pyridine ( <b>Py</b> ), 1,3-dimethylimidazolin-2-ylidene ( <b>IMe</b> ) and DABCO ( <b>Dabco</b> ) to methyl allenoate calculated at the M06-2X and CCSD(T) levels. The electronic energies, $\Delta E_{\text{ele}}$ in kcal mol <sup>-1</sup> , are relative to separated reactants. . . . . | 6  |
| S3  | Addition of the Lewis base to <i>s-trans</i> methyl allenoate. LB- <b>ts3x</b> and LB- <b>3x</b> are the Z-type structures, and LB- <b>ts3x'</b> and LB- <b>3x'</b> are the E-type structures. . . . .                                                                                                    | 7  |
| S4  | Z/E-type transition structures (LB- <b>ts3/LB-ts3'</b> ) and adducts (LB- <b>3/LB-3'</b> ) for the the addition of <b>Pph</b> and <b>Hmpt</b> to <i>s-cis</i> <b>1</b> . Electrostatic potential is mapped onto the total electron density with the isosurface of 0.02. . . . .                           | 9  |
| S5  | Z/E-type transition structures (LB- <b>ts3/LB-ts3'</b> ) and adducts (LB- <b>3/LB-3'</b> ) for the the addition of <b>Dabco</b> to <i>s-cis</i> <b>1</b> . Electrostatic potential is mapped onto the total electron density with the isosurface of 0.02. . . . .                                         | 10 |
| S6  | Z/E-type transition structures (LB- <b>ts3/LB-ts3'</b> ) and adducts (LB- <b>3/LB-3'</b> ) for the the addition of <b>Dmap</b> and <b>Mtbd</b> to <i>s-cis</i> <b>1</b> . Electrostatic potential is mapped onto the total electron density with the isosurface of 0.02. . . . .                          | 11 |
| S7  | Protonation and methylation for the $\alpha$ - and $\gamma$ -carbon atoms of the E-type adducts, LB- <b>3'</b> . . . . .                                                                                                                                                                                  | 14 |
| S8  | Energy profiles for the PPh <sub>3</sub> -catalyzed $\alpha$ - and $\gamma$ -[3 + 2] cycloadditions. . . . .                                                                                                                                                                                              | 18 |
| S9  | Energy profiles for the PPh <sub>3</sub> -catalyzed $\gamma$ -[3 + 2] and $\gamma$ -[2 + 4] cycloadditions. . . . .                                                                                                                                                                                       | 19 |
| S10 | Energy profiles for the PPh <sub>3</sub> -catalyzed $\gamma$ -[3 + 2] cycloadditions starting from <b>Pph-3</b> and <b>Pph-3'</b> . . . . .                                                                                                                                                               | 20 |
| S11 | Energy profiles for the DABCO-catalyzed $\gamma$ -[2 + 4] cycloadditions starting from <b>Dabco-3</b> and <b>Dabco-3'</b> . . . . .                                                                                                                                                                       | 21 |
| S12 | Energy profiles for the DABCO-catalyzed $\gamma$ -[2 + 2], $\gamma$ -[3 + 2] and $\gamma$ -[2 + 2 + 2] cycloadditions of <b>1</b> and ketone <b>2c</b> . . . . .                                                                                                                                          | 22 |
| S13 | Energy profiles for the <b>IPr</b> -catalyzed $\gamma$ -[2 + 2], $\gamma$ -[3 + 2] and $\gamma$ -[2 + 2 + 2] cycloadditions of <b>1</b> and ketone <b>2c</b> . . . . .                                                                                                                                    | 23 |

|     |                                                                                                                                                                                    |    |
|-----|------------------------------------------------------------------------------------------------------------------------------------------------------------------------------------|----|
| S14 | Energy profiles for the <b>IPr</b> -catalyzed $\gamma$ -[2 + 2 + 2] cycloadditions, yielding <i>trans</i> - and <i>cis</i> -products. . . . .                                      | 24 |
| S15 | Geometry of <b>IPr-<math>\gamma</math>-5c'</b> . . . . .                                                                                                                           | 25 |
| S16 | Energy profiles for the <b>PPh<sub>3</sub></b> -catalyzed $\gamma$ -[2 + 2], $\gamma$ -[3 + 2] and $\gamma$ -[2 + 2 + 2] cycloadditions of <b>1</b> and ketone <b>2c</b> . . . . . | 26 |

## List of Tables

|    |                                                                                                                                                                                                                                                                                                                                                                                                                                                   |    |
|----|---------------------------------------------------------------------------------------------------------------------------------------------------------------------------------------------------------------------------------------------------------------------------------------------------------------------------------------------------------------------------------------------------------------------------------------------------|----|
| S1 | Free energies and enthalpies ( $\Delta G$ [ $\Delta H$ ] in kcal mol <sup>-1</sup> ) for the addition of the Lewis bases to <i>s-trans</i> <b>1</b> . All energies are relative to the separated Lewis bases and methyl allenoate <b>1</b> . . . . .                                                                                                                                                                                              | 8  |
| S2 | Solvent effect on free energies and enthalpies ( $\Delta G$ [ $\Delta H$ ] in kcal mol <sup>-1</sup> ) for the addition of the four Lewis bases, <b>IPr</b> , <b>Pph</b> , <b>Dabco</b> and <b>Dmap</b> , to <i>s-cis</i> <b>1</b> . . . . .                                                                                                                                                                                                      | 12 |
| S3 | Computed dipole moments (unit in Debye) for the transition states and adducts in five different solvents. . . . .                                                                                                                                                                                                                                                                                                                                 | 13 |
| S4 | Proton affinities calculated according to the formula, $\Delta H = (H_{\text{LB-3}'}^{298} + H_{\text{proton}}^{298}) - H_{\text{LB-3'-H}}^{298}$ where $\Delta H_{\text{proton}}^{298}$ is equal to 1.5 kcal mol <sup>-1</sup> . The activation free energies, $\Delta G^\ddagger$ in kcal mol <sup>-1</sup> , for the the S <sub>N</sub> 2 attack on MeCl are reported relative to the separated reactants, Lewis bases and allenoates. . . . . | 15 |
| S5 | Hirshfeld atomic charges on the C <sub><math>\alpha</math></sub> and C <sub><math>\gamma</math></sub> in <b>LB-3</b> with and without summing the attached hydrogen atoms. . . . .                                                                                                                                                                                                                                                                | 16 |
| S6 | HOMO-orbital contributions on the C <sub><math>\alpha</math></sub> and C <sub><math>\gamma</math></sub> atoms in <b>LB-3</b> . . . . .                                                                                                                                                                                                                                                                                                            | 16 |
| S7 | Free energies and enthalpies, $\Delta G$ [ $\Delta H$ ] in kcal mol <sup>-1</sup> , for the [3 + 2] cycloaddition of the adducts ( <b>LB-3</b> and <b>LB-3'</b> ) and ethylene <b>2a</b> . . . . .                                                                                                                                                                                                                                                | 17 |

# 1 Assessment of performance of M06-2X

The reaction of trimethylphosphine with methyl allenolate yielding the  $\text{PMe}_3$  · allenolate adduct is used to evaluate the accuracy of the chosen computational method (Figure S1). The M06-2X/6-31+G\* method was used to optimize all geometries discussed in this paper. Additional single point calculations with the optimized geometries employing more sophisticated methods, M06-2X/6-311++G\*\*, CCSD(T)/6-31+G\* and CCSD(T)/6-311++G\*\*, were done to obtain more reliable values for the electronic properties of the discussed structures. The M06-2X/6-311++G\*\*//M06-2X/6-31+G\* calculations show that the size of the basis set has only a small influence on the relative electronic energies of the discussed reaction (Figure S1). The range of energy difference is between 0.1 and 1.9 kcal mol<sup>-1</sup>. The influence of the chosen correlation method is also small as the comparison of the M06-2X results with those obtained from CCSD(T) calculations shows. The M06-2X energies are up to 3 kcal mol<sup>-1</sup> lower than the CCSD(T) energies, but the two methods show the same chemical trend.

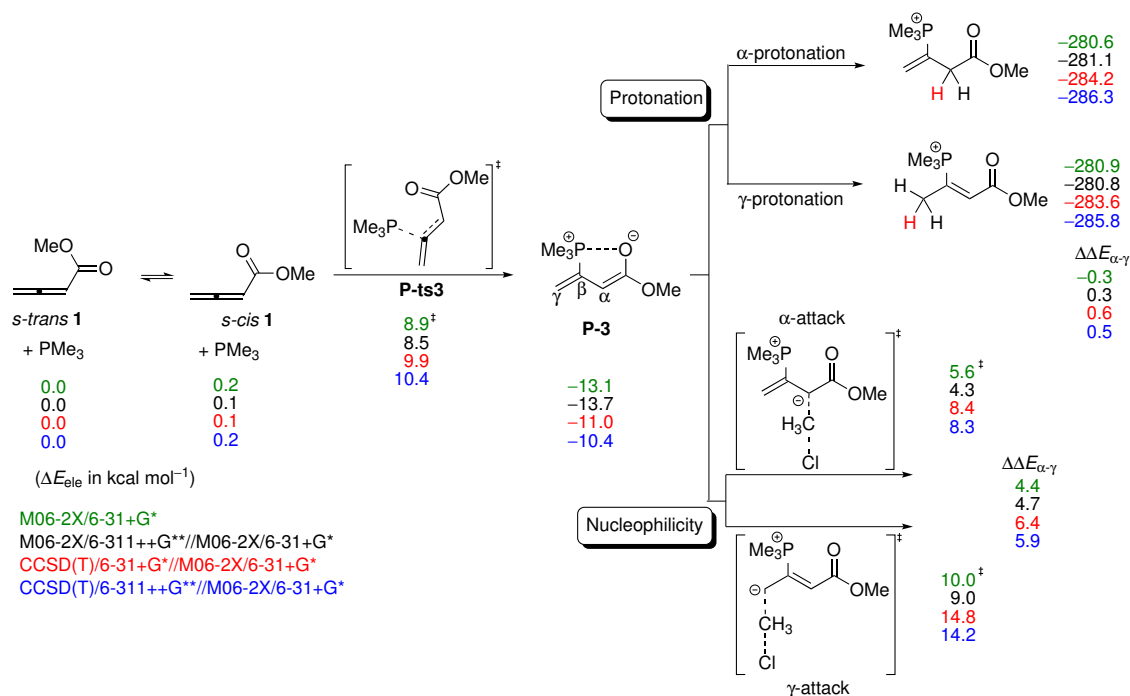

Figure S1: Evaluation of the M06-2X and CCSD(T) methods for the addition of  $\text{PMe}_3$  to methyl allenolate. The electronic energies,  $\Delta E_{\text{ele}}$  in kcal mol<sup>-1</sup>, are relative to separated reactants.

The  $\alpha$ - and  $\gamma$ -carbon atoms in  $\text{PMe}_3 \cdot$  allenoate have both basic and nucleophilic properties. The protonated  $\alpha$ - and  $\gamma$ -adducts differ less than  $1 \text{ kcal mol}^{-1}$  in energy, and hence the  $\text{C}_\alpha$  and  $\text{C}_\gamma$  atoms have similar proton affinities (Figure S1). However, the barrier for the nucleophilic attack of  $\text{C}_\alpha$  at the carbon atom of  $\text{CH}_3\text{Cl}$  is 4 to 5  $\text{kcal mol}^{-1}$  lower in energy than that for the corresponding reaction of  $\text{C}_\gamma$ , which indicates that  $\text{C}_\alpha$  is significantly more nucleophilic than  $\text{C}_\gamma$ . The M06-2X data are qualitatively reproduced by the high level CCSD(T) calculations displaying the same reactivity.

Similar tests for the addition of the allenoate to pyridine **Py**, 1,3-dimethylimidazolin-2-ylidene **IMe** and 1,4-diazabicyclo[2.2.2]octane **Dabco** (Figure S2) show that the CCSD(T) calculations essentially reproduce the M06-2X data with a maximum error of  $3 \text{ kcal mol}^{-1}$  in  $\Delta E_{\text{ele}}$  while predicting the same chemical reactivity. Hence, the less expensive M06-2X/6-31+G\* method was used for calculations discussed in this study.

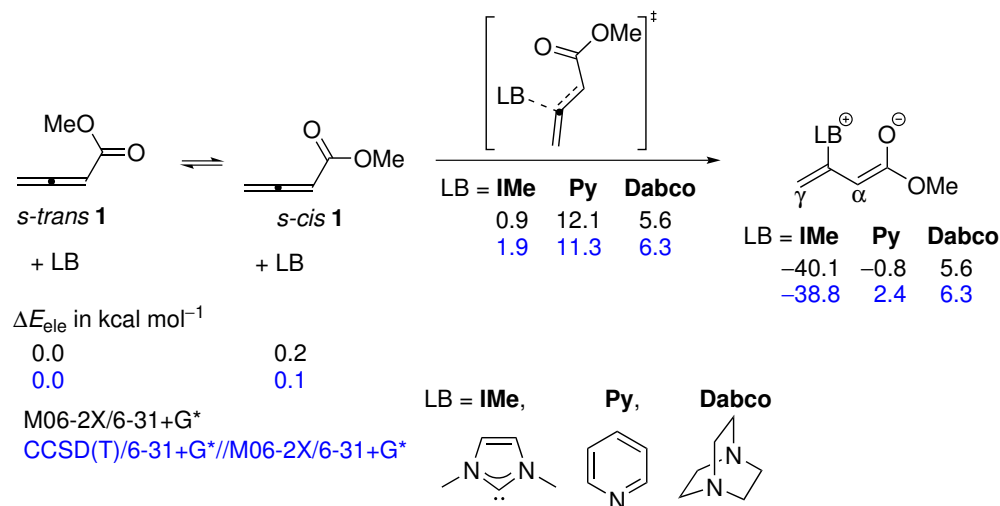

Figure S2: Addition of pyridine (**Py**), 1,3-dimethylimidazolin-2-ylidene (**IMe**) and DABCO (**Dabco**) to methyl allenoate calculated at the M06-2X and CCSD(T) levels. The electronic energies,  $\Delta E_{\text{ele}}$  in  $\text{kcal mol}^{-1}$ , are relative to separated reactants.

## 2 Addition of Lewis bases to *s-trans* methyl allenoate

Figure S3 shows the mechanism of the addition of the Lewis base to *s-trans* methyl allenoate **1**. Table S1 summarizes the barriers of the *Z/E*-type addition and the energies of the forming adducts. The addition to *s-trans* **1** is less favorable than that to *s-cis* **1** (Scheme 2 and Table 1 in the main text).

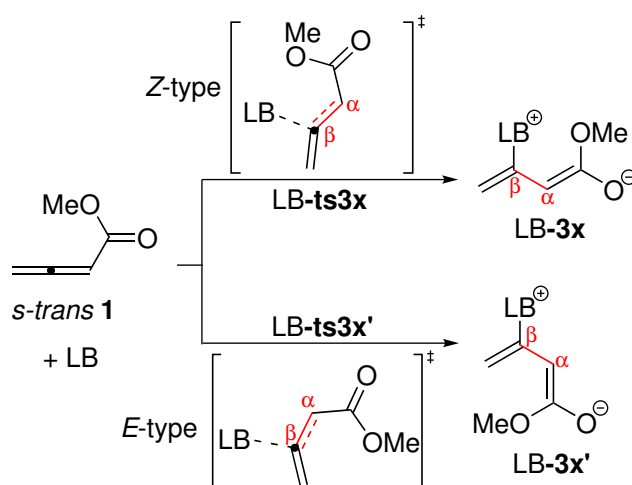

Figure S3: Addition of the Lewis base to *s-trans* methyl allenoate. LB-ts3x and LB-3x are the Z-type structures, and LB-ts3x' and LB-3x' are the E-type structures.

|                 | Z-type addition |               | E-type addition  |                |
|-----------------|-----------------|---------------|------------------|----------------|
|                 | LB- <b>ts3x</b> | LB- <b>3x</b> | LB- <b>ts3x'</b> | LB- <b>3x'</b> |
| LB = NHC        |                 |               |                  |                |
| <b>IMe</b>      | 17.3 [3.3]      | -18.5 [-32.6] |                  |                |
| <b>IPr</b>      | 18.8 [3.8]      | -14.4 [-30.7] | 17.0 [1.1]       | -14.0 [-28.7]  |
| phosphine       |                 |               |                  |                |
| <b>Pbu</b>      | 22.8 [8.4]      | 9.6 [-6.8]    |                  |                |
| <b>Pph</b>      | 26.0 [9.8]      | 16.6 [-1.2]   | 28.9 [13.1]      | 17.2 [2.4]     |
| <b>Hmpt</b>     | 28.3 [14.1]     | 6.5 [-7.0]    | 29.1 [15.5]      | 9.8 [-3.9]     |
| amine           |                 |               |                  |                |
| <b>Quin</b>     | 23.5 [9.6]      | 23.0 [7.7]    | 24.5 [10.2]      | 21.9 [7.1]     |
| <b>Dabco</b>    | 24.0 [10.9]     | 23.4 [9.5]    | 24.0 [11.5]      | 22.5 [9.0]     |
| aza-heterocycle |                 |               |                  |                |
| <b>Dmap</b>     | 24.1 [11.0]     | 14.7 [0.4]    | 25.3 [12.6]      | 16.5 [2.7]     |
| <b>Py</b>       | 25.5 [13.2]     | 18.9 [5.5]    | 28.6 [15.4]      | 22.3 [8.5]     |
| <b>Dbu</b>      | 21.1 [7.3]      | 4.6 [-10.2]   | 22.5 [8.4]       | 8.5 [-5.8]     |
| <b>Mtbd</b>     | 26.4 [11.6]     | 7.8 [-7.4]    | 22.7 [9.5]       | 12.3 [-1.6]    |

Table S1: Free energies and enthalpies ( $\Delta G$  [ $\Delta H$ ] in kcal mol<sup>-1</sup>) for the addition of the Lewis bases to *s-trans* **1**. All energies are relative to the separated Lewis bases and methyl allenolate **1**.

### 3 Electrostatic potential surface maps for the addition of LBs to *s-cis* **1**

Figure S4 shows electrostatic potential surface maps for the transition states (TSs) and the adducts in the addition of **Pph** and **Hmpt** to *s-cis* **1**. The P...O distance in the Z-type TSs is closer than that in the E-type TSs, which suggests stronger electrostatic interactions in the Z-type structures. The carbonyl oxygen atom rests on the top of the phenyl ring or the dimethylamino group in the E-type TSs, and interacts therefore less with the P atom.



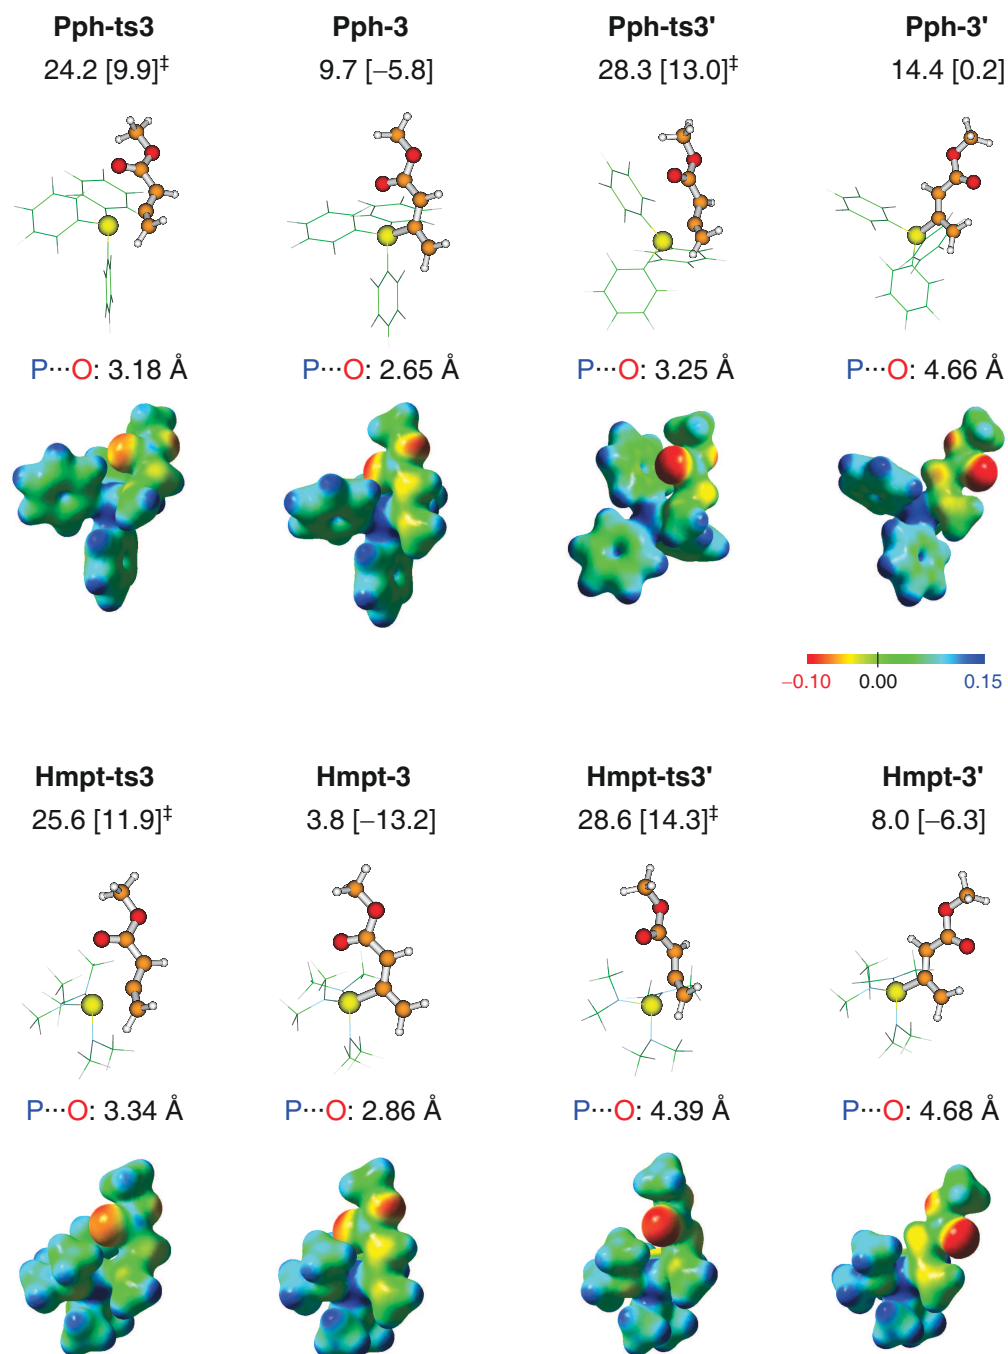

Figure S4: *Z/E*-type transition structures (LB-**ts3**/LB-**ts3'**) and adducts (LB-**3**/LB-**3'**) for the the addition of **Pph** and **Hmpt** to *s-cis* **1**. Electrostatic potential is mapped onto the total electron density with the isosurface of 0.02.

The structures for the addition of **Dabco** to **1**, as shown in Figure S5, reveal that the carbonyl oxygen atom interacts with two methylene groups ( $-\text{CH}_2-$ ) of **Dabco** in the *Z*-type addition, and with one methylene group in the *E*-type addition. The barrier for the rotation of the ester is 1.5 kcal mol<sup>-1</sup> higher than that for the the *E*-type addition of **Dabco** to the allenolate. The two-step addition process was also observed in the case of **Quin**. Hence, only the activation energies of the rate-determining TSs are listed for **Dabco** and **Quin** in Table 1 of the main text.

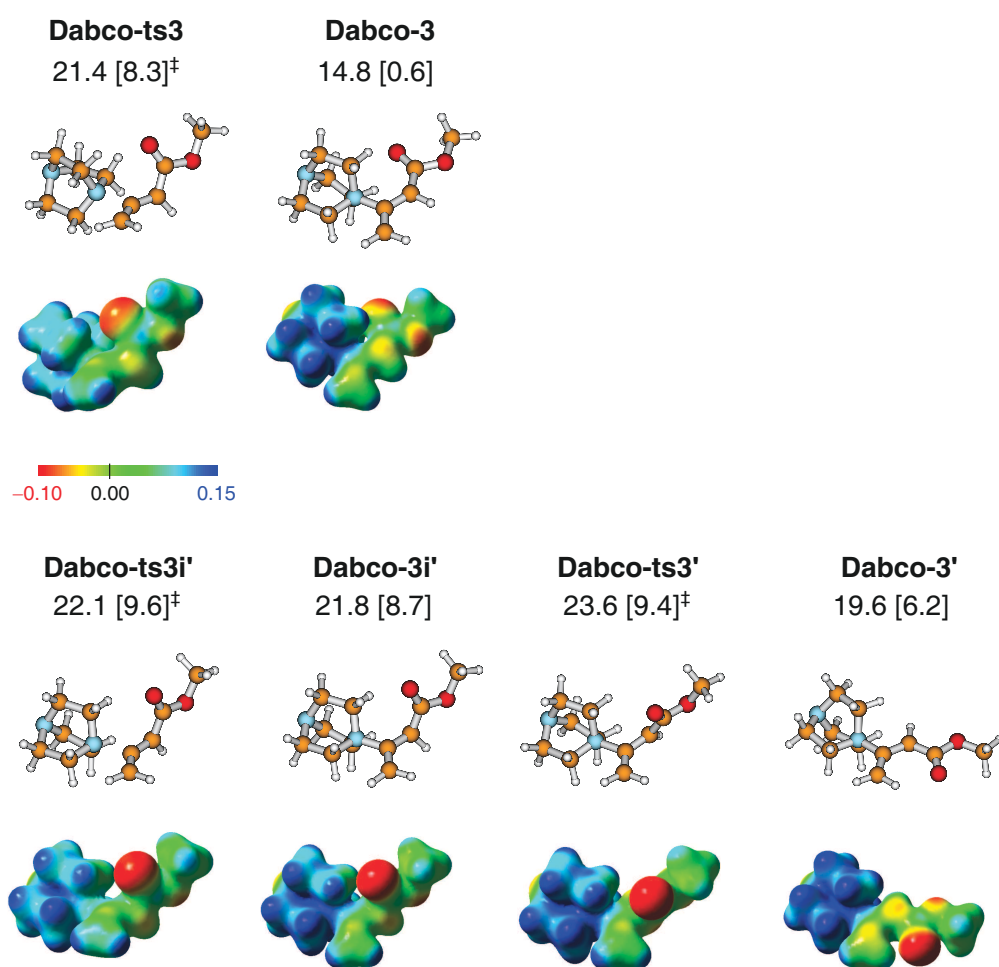

Figure S5: *Z/E*-type transition structures (**LB-ts3/LB-ts3'**) and adducts (**LB-3/LB-3'**) for the the addition of **Dabco** to *s-cis* **1**. Electrostatic potential is mapped onto the total electron density with the isosurface of 0.02.

Figure S6 shows geometries for the addition of **Dmap**/**Mtbs** to *s-cis* **1** and electrostatic potential surface maps. The carbonyl oxygen atom in **1** is oriented towards the pyridine ring in the Z-type structures (**Dmap-ts3** and **Dmap-3**), but points away from the pyridin ring in **Dmap-ts3'** and **Dmap-3'**. The carbonyl oxygen atom points towards the guanidine carbon atom in **Mtbd-ts3**, and towards the methyl group in **Mtbd-ts3'**. All of the Z-type TSs have favorable electrostatic interactions between the carbonyl oxygen atom and the LBs, stabilizing the structures.

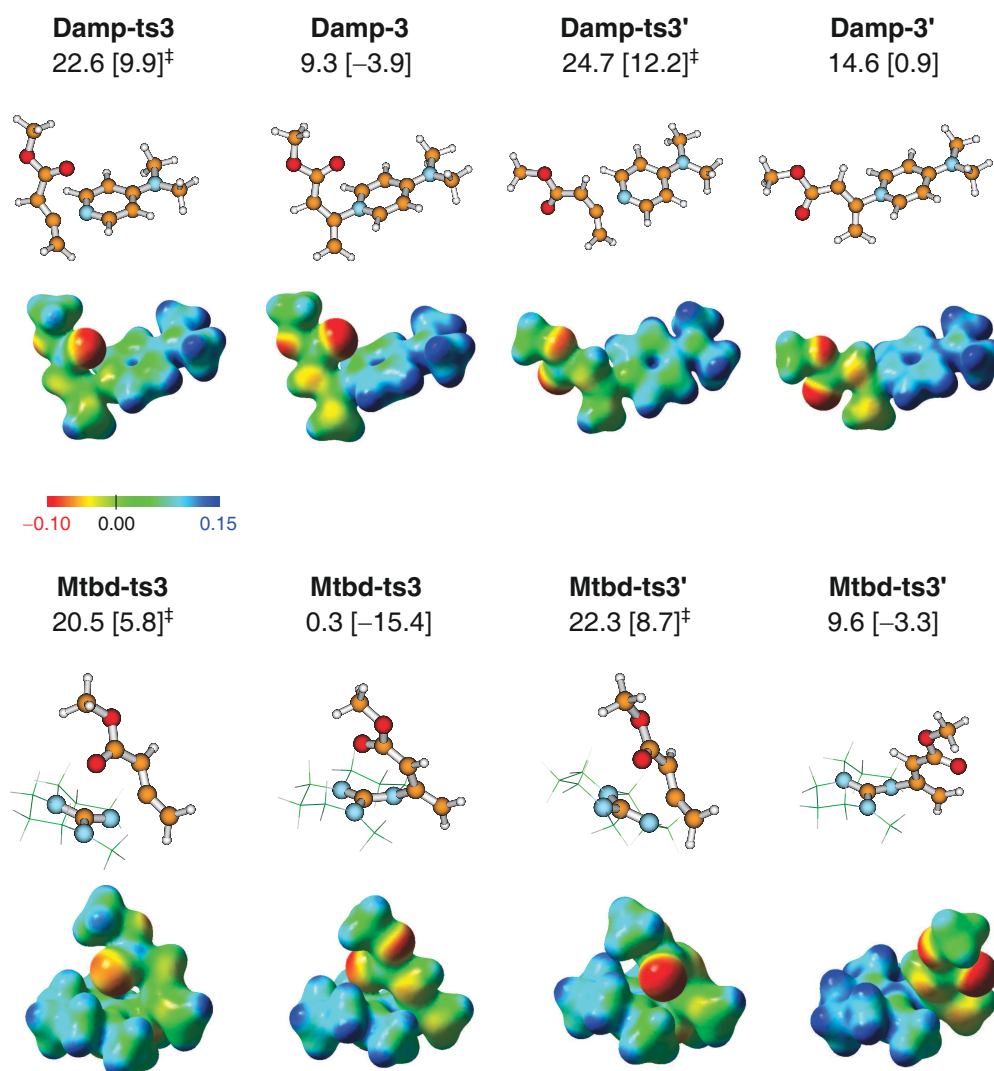

Figure S6: Z/E-type transition structures (LB-ts3/LB-ts3') and adducts (LB-3/LB-3') for the the addition of **Dmap** and **Mtbd** to *s-cis* **1**. Electrostatic potential is mapped onto the total electron density with the isosurface of 0.02.

## 4 Solvent effect

Table S2 lists the free energies and enthalpies of selected stationary points in the addition of the four Lewis Bases, **IPr**, **Pph**, **Dabco** and **Dmap** to *s-cis* **1** in five different solvents. The computed dipole moments of the TSs and adducts optimized using the IEFPCM model are listed in Table S3. The dipole moment is larger in the *E*-type structures than that in the corresponding *Z*-type ones.

|                   | vacuum<br>$\epsilon = 1$ | toluene<br>2.4 | CHCl <sub>3</sub><br>4.7 | THF<br>7.4    | CH <sub>2</sub> Cl <sub>2</sub><br>8.9 | MeCN<br>35.7  |
|-------------------|--------------------------|----------------|--------------------------|---------------|----------------------------------------|---------------|
| <b>IPr-ts3</b>    | 17.7 [3.3]               | 19.2 [4.6]     | 19.7 [5.3]               | 20.4 [5.7]    | 20.5 [5.8]                             | 20.4 [5.8]    |
| <b>IPr-ts3'</b>   | 17.1 [2.3]               | 18.6 [3.1]     | 19.2 [3.6]               | 19.3 [3.8]    | 19.3 [3.6]                             | 19.4 [4.3]    |
| <b>IPr-3</b>      | -21.3 [-36.3]            | -20.7 [-36.3]  | -21.0 [-36.4]            | -20.7 [-36.5] | -20.6 [-36.6]                          | -20.3 [-36.6] |
| <b>IPr-3'</b>     | -17.2 [-30.9]            | -19.3 [-32.9]  | -21.3 [-34.8]            | -21.1 [-36.6] | -22.3 [-36.0]                          | -22.7 [-37.3] |
| <b>Pph-ts3</b>    | 24.2 [9.0]               | 24.6 [9.4]     | 24.4 [9.5]               | 24.2 [9.5]    | 22.8 [8.8]                             | 22.8 [8.7]    |
| <b>Pph-ts3'</b>   | 28.3 [13.0]              | 25.9 [11.8]    | 26.6 [11.2]              | 26.3 [10.8]   | 26.0 [10.7]                            | 25.2 [10.2]   |
| <b>Pph-3</b>      | 9.7 [-5.8]               | 8.8 [-6.5]     | 8.3 [-7.0]               | 8.2 [-7.3]    | 7.9 [-7.4]                             | 7.6 [-7.9]    |
| <b>Pph-3'</b>     | 14.4 [0.2]               | 11.5 [-3.1]    | 9.8 [-4.9]               | 9.1 [-5.7]    | 8.6 [-5.9]                             | 7.5 [-7.0]    |
| <b>Dabco-ts3</b>  | 21.4 [8.3]               | 21.6 [7.1]     | 19.6 [7.3]               | 19.6 [7.3]    | 19.6 [7.2]                             | 19.1 [7.0]    |
| <b>Dabco-ts3'</b> | 23.6 [9.4]               | 21.8 [7.6]     | 18.3 [7.4]               | 19.1 [7.2]    | 19.0 [7.2]                             | 18.7 [6.8]    |
| <b>Dabco-3</b>    | 14.8 [0.6]               | 13.8 [-1.5]    | 11.6 [-1.9]              | 11.2 [-2.3]   | 11.0 [-2.4]                            | 10.5 [-2.9]   |
| <b>Dabco-3'</b>   | 19.6 [6.2]               | 15.3 [0.5]     | 11.5 [-1.5]              | 10.3 [-2.7]   | 10.0 [-3.0]                            | 8.4 [-4.5]    |
| <b>Dmap-ts3</b>   | 22.6 [9.9]               | 22.6 [9.9]     | 22.3 [9.7]               | 22.0 [9.6]    | 21.8 [9.5]                             | 22.1 [9.3]    |
| <b>Dmap-ts3'</b>  | 24.7 [12.2]              | 23.0 [10.5]    | 23.0 [10.5]              | 22.9 [10.3]   | 22.9 [10.3]                            | 22.7 [10.0]   |
| <b>Dmap-3</b>     | 9.3 [-3.9]               | 7.4 [-6.6]     | 6.2 [-8.0]               | 5.5 [-8.6]    | 5.3 [-8.8]                             | 4.2 [-9.6]    |
| <b>Dmap-3'</b>    | 14.6 [0.9]               | 9.2 [-4.6]     | 7.0 [-7.8]               | 5.2 [-8.3]    | 4.9 [-8.7]                             | 3.6 [-10.0]   |

The structures with considering solvent effects were optimized in the IEFPCM model, rather than single-point calculations on the gas-optimized geometries.

Table S2: Solvent effect on free energies and enthalpies ( $\Delta G$  [ $\Delta H$ ] in kcal mol<sup>-1</sup>) for the addition of the four Lewis bases, **IPr**, **Pph**, **Dabco** and **Dmap**, to *s-cis* **1**.

|                   | vacuum<br>$\epsilon = 1$ | toluene<br>2.4 | CHCl <sub>3</sub><br>4.7 | THF<br>7.4 | CH <sub>2</sub> Cl <sub>2</sub><br>8.9 | MeCN<br>35.7 |
|-------------------|--------------------------|----------------|--------------------------|------------|----------------------------------------|--------------|
| <b>IPr-ts3</b>    | 3.40                     | 4.21           | 4.99                     | 5.26       | 5.36                                   | 7.03         |
| <b>IPr-ts3'</b>   | 4.89                     | 5.74           | 6.37                     | 6.61       | 6.68                                   | 7.40         |
| <b>IPr-3</b>      | 6.26                     | 7.57           | 8.44                     | 8.91       | 9.06                                   | 9.73         |
| <b>IPr-3'</b>     | 9.58                     | 11.49          | 12.75                    | 13.43      | 13.65                                  | 14.65        |
| <b>Pph-ts3</b>    | 3.95                     | 4.69           | 5.16                     | 5.39       | 5.79                                   | 6.14         |
| <b>Pph-ts3'</b>   | 5.71                     | 6.44           | 6.91                     | 7.05       | 7.09                                   | 7.31         |
| <b>Pph-3</b>      | 5.73                     | 7.03           | 7.82                     | 8.20       | 8.33                                   | 8.87         |
| <b>Pph-3'</b>     | 10.44                    | 12.35          | 13.41                    | 13.91      | 14.07                                  | 14.72        |
| <b>Dabco-ts3</b>  | 3.97                     | 4.59           | 4.87                     | 5.04       | 5.10                                   | 5.34         |
| <b>Dabco-ts3'</b> | 5.46                     | 5.67           | 5.71                     | 5.72       | 5.82                                   | 8.72         |
| <b>Dabco-3</b>    | 5.88                     | 6.95           | 7.56                     | 7.84       | 7.93                                   | 8.31         |
| <b>Dabco-3'</b>   | 9.77                     | 11.17          | 11.88                    | 12.18      | 12.27                                  | 12.62        |
| <b>Dmap-ts3</b>   | 7.11                     | 8.24           | 8.70                     | 8.90       | 9.29                                   | 9.59         |
| <b>Dmap-ts3'</b>  | 10.53                    | 11.13          | 11.40                    | 11.51      | 11.55                                  | 11.71        |
| <b>Dmap-3</b>     | 10.51                    | 12.32          | 13.24                    | 13.63      | 13.75                                  | 14.24        |
| <b>Dmap-3'</b>    | 14.42                    | 17.93          | 19.16                    | 19.68      | 19.85                                  | 20.48        |

Table S3: Computed dipole moments (unit in Debye) for the transition states and adducts in five different solvents.

## 5 Protonation and nucleophilicity

Figure S7 shows the mechanism of  $\alpha/\gamma$ -protonation of the *E*-type adducts LB-3' and the  $S_N2$  reaction with  $\text{CH}_3\text{Cl}$ . Table S4 summarizes proton affinities and the barrier heights for the  $\alpha/\gamma$ -attack of LB-3' on  $\text{CH}_3\text{Cl}$ . The  $\text{C}_\gamma$  atom usually has a higher proton affinity than  $\text{C}_\alpha$ . However, the  $\alpha$ -carbon is more nucleophilic than  $\text{C}_\gamma$ , as revealed by the lower barriers for the  $\alpha$ -attack.

Tables S5 and S6 show the charges and the contributions of  $\text{C}_\alpha$  and  $\text{C}_\gamma$  to the HOMO  $\pi$ -orbital in LB-3. Both the charges on and orbital coefficients of  $\text{C}_\alpha$  are larger than those of  $\text{C}_\gamma$ .

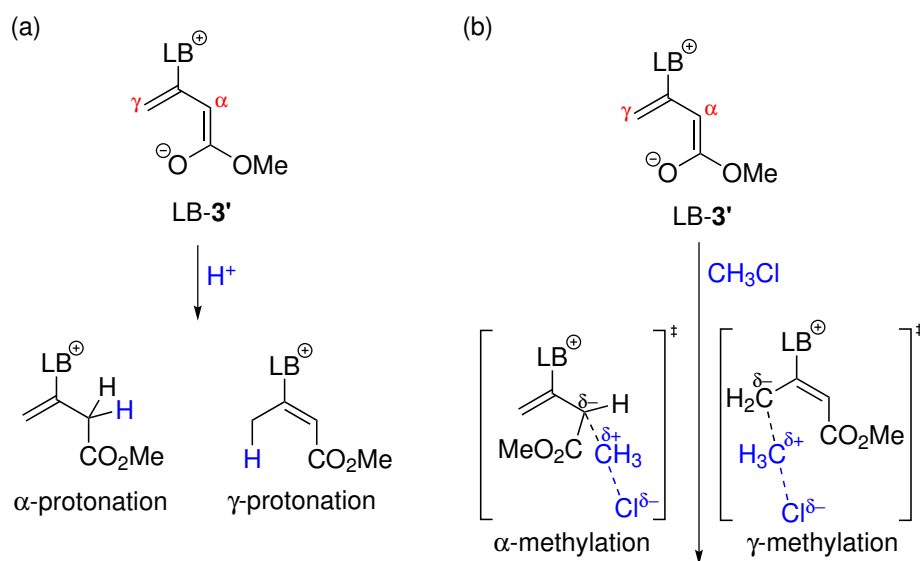

Figure S7: Protonation and methylation for the  $\alpha$ - and  $\gamma$ -carbon atoms of the *E*-type adducts, LB-3'.

| LB-3'           | proton affinity ( $\Delta H$ ) |               | methylation ( $\Delta G^\ddagger$ ) |               |
|-----------------|--------------------------------|---------------|-------------------------------------|---------------|
|                 | C $_{\alpha}$                  | C $_{\gamma}$ | C $_{\alpha}$                       | C $_{\gamma}$ |
| LB = NHC        |                                |               |                                     |               |
| <b>IMe</b>      | xx                             | xx            | xx                                  | xx            |
| <b>IPr</b>      | 275.4                          | 277.9         | 10.0                                | 13.2          |
| phosphine       |                                |               |                                     |               |
| <b>Pbu</b>      | xx                             | xx            | xx                                  | xx            |
| <b>Pph</b>      | 270.4                          | 271.0         | 42.8                                | 45.9          |
| <b>Hmpt</b>     | 268.3                          | 268.4         | 36.1                                | 39.5          |
| amine           |                                |               |                                     |               |
| <b>Quin</b>     | 266.9                          | 266.6         | 49.0                                | 52.1          |
| <b>Dabco</b>    | 264.8                          | 264.5         | 49.8                                | 53.2          |
| aza-heterocycle |                                |               |                                     |               |
| <b>Dmap</b>     | 266.7                          | 269.9         | 41.7                                | 45.2          |
| <b>Py</b>       | 259.6                          | 262.3         | 50.2                                | 52.9          |
| <b>Dbu</b>      | 275.5                          | 273.2         | 33.8                                | 36.5          |
| <b>Mtbd</b>     | 275.1                          | 277.7         | 34.7                                | 41.1          |

Table S4: Proton affinities calculated according to the formula,  $\Delta H = (H_{\text{LB-3}'}^{298} + H_{\text{proton}}^{298}) - H_{\text{LB-3}'\text{-H}}^{298}$  where  $\Delta H_{\text{proton}}^{298}$  is equal to 1.5 kcal mol<sup>-1</sup>. The activation free energies,  $\Delta G^\ddagger$  in kcal mol<sup>-1</sup>, for the the S<sub>N</sub>2 attack on MeCl are reported relative to the separated reactants, Lewis bases and allenates.

| LB · allenoate  | Hirshfeld charge with H |            | Hirshfeld charge without H |            |
|-----------------|-------------------------|------------|----------------------------|------------|
|                 | $C_\alpha$              | $C_\gamma$ | $C_\alpha$                 | $C_\gamma$ |
| LB = NHC        |                         |            |                            |            |
| <b>IMe</b>      | -0.15                   | -0.13      | -0.18                      | -0.17      |
| <b>IPr</b>      | -0.14                   | -0.09      | -0.17                      | -0.14      |
| phosphine       |                         |            |                            |            |
| <b>Pbu</b>      | -0.14                   | -0.09      | -0.17                      | -0.14      |
| <b>Pph</b>      | -0.14                   | -0.08      | -0.17                      | -0.14      |
| <b>Hmpt</b>     | -0.14                   | -0.09      | -0.17                      | -0.14      |
| amine           |                         |            |                            |            |
| <b>Quin</b>     | -0.15                   | -0.11      | -0.18                      | -0.17      |
| <b>Dabco</b>    | -0.15                   | -0.11      | -0.18                      | -0.17      |
| aza-heterocycle |                         |            |                            |            |
| <b>Dmap</b>     | -0.16                   | -0.14      | -0.19                      | -0.18      |
| <b>Py</b>       | -0.16                   | -0.12      | -0.18                      | -0.17      |
| <b>Dbu</b>      | -0.15                   | -0.14      | -0.18                      | -0.17      |
| <b>Mtbd</b>     | -0.16                   | -0.12      | -0.18                      | -0.17      |

Table S5: Hirshfeld atomic charges on the  $C_\alpha$  and  $C_\gamma$  in LB-3 with and without summing the attached hydrogen atoms.

| LB · allenoate  | HOMO coefficient |            |
|-----------------|------------------|------------|
|                 | $C_\alpha$       | $C_\gamma$ |
| LB = NHC        |                  |            |
| <b>IMe</b>      | 0.13             | -0.10      |
| <b>IPr</b>      | 0.13             | -0.08      |
| phosphine       |                  |            |
| <b>Pbu</b>      | 0.14             | -0.09      |
| <b>Pph</b>      | 0.15             | -0.10      |
| <b>Hmpt</b>     | 0.14             | -0.08      |
| amine           |                  |            |
| <b>Quin</b>     | 0.14             | -0.09      |
| <b>Dabco</b>    | 0.14             | -0.09      |
| aza-heterocycle |                  |            |
| <b>Dmap</b>     | 0.13             | -0.09      |
| <b>Py</b>       | 0.14             | -0.09      |
| <b>Dbu</b>      | 0.13             | -0.09      |
| <b>Mtbd</b>     | 0.13             | -0.09      |

Table S6: HOMO-orbital contributions on the  $C_\alpha$  and  $C_\gamma$  atoms in LB-3.



## 6 [3 + 2] cycloadditions with ethylene 2a

The adducts, LB-3 and LB-3', react with ethylene 2a to form five-membered rings with exocyclic C=C bonds or ylidic bonds. Free energies and enthalpies for the [3 + 2] cycloaddition are listed in Table S7. The formation of the [3+2] intermediates obtained with the NHCs, phosphines and aza-arenes is exergonic.

|                 | [3+2] cycloaddition starting from LB-3 |              |               | [3+2] cycloaddition starting from LB-3' |             |               |
|-----------------|----------------------------------------|--------------|---------------|-----------------------------------------|-------------|---------------|
|                 | LB-3 + 2a                              | LB-ts4a      | LB-4a         | LB-3' + 2a                              | LB-ts4a'    | LB-4a'        |
| LB = NHC        |                                        |              |               |                                         |             |               |
| <b>IMe</b>      | -23.3 [-38.0]                          | 10.6 [-17.4] | -44.1 [-72.6] |                                         |             |               |
| <b>IPr</b>      | -21.3 [-36.3]                          | 10.8 [-19.2] | -49.9 [-80.5] | -17.2 [-30.9]                           | 9.9 [-19.1] | -52.1 [-82.5] |
| phosphine       |                                        |              |               |                                         |             |               |
| <b>Pbu</b>      | 1.4 [-13.9]                            | 31.7 [3.6]   | -12.9 [-40.2] |                                         |             |               |
| <b>Pph</b>      | 9.7 [-5.8]                             | 40.1 [11.2]  | -6.6 [-36.5]  | 14.4 [0.2]                              | 42.4 [14.5] | -8.5 [-39.3]  |
| <b>Hmpt</b>     | 3.8 [-13.2]                            | 33.1 [4.3]   | -15.7 [-45.9] | 8.0 [-6.3]                              | 35.1 [7.9]  | -15.4 [-44.1] |
| amine           |                                        |              |               |                                         |             |               |
| <b>Quin</b>     | 14.8 [-1.0]                            | 49.0 [20.4]  | 13.4 [-16.3]  | 19.0 [4.2]                              | 51.0 [22.5] | 14.1 [-14.7]  |
| <b>Dabco</b>    | 14.8 [0.6]                             | 49.2 [22.1]  | 13.5 [-14.8]  | 19.6 [6.2]                              | 51.6 [24.5] | 14.1 [-13.1]  |
| aza-heterocycle |                                        |              |               |                                         |             |               |
| <b>Dmap</b>     | 9.9 [-3.9]                             | 45.4 [18.7]  | -3.0 [-31.0]  | 14.6 [0.9]                              | 46.2 [19.5] | -2.6 [-30.0]  |
| <b>Py</b>       | 15.4 [1.3]                             | 47.3 [20.8]  | -10.9 [-38.0] | 20.1 [6.5]                              | 48.5 [21.9] | -10.3 [-37.6] |
| <b>Dbu</b>      | -1.0 [-16.6]                           | 36.4 [8.3]   | 8.6 [-21.3]   | 6.7 [-7.3]                              | 41.3 [14.1] | 6.0 [-20.7]   |
| <b>Mtbd</b>     | 0.3 [-15.4]                            | 39.2 [11.8]  | 6.3 [-21.8]   | 9.6 [-3.3]                              | 45.5 [18.8] | 11.1 [-17.0]  |

Table S7: Free energies and enthalpies,  $\Delta G$  [ $\Delta H$ ] in kcal mol<sup>-1</sup>, for the [3 + 2] cycloaddition of the adducts (LB-3 and LB-3') and ethylene 2a.

## 7 Cycloadditions with enone 2b

The **Pph-3** adduct reacts with enone **2b** to form either  $\alpha$ - or  $\gamma$ -[3 + 2] ylides, as shown in Figure S8. The  $\gamma$ -[3 + 2] cycloaddition ( $\Delta G^\ddagger$ : 21.6 kcal mol<sup>-1</sup>) requires a higher activation energy than the  $\alpha$ -[3 + 2] addition ( $\Delta G^\ddagger$ : 18.9 kcal mol<sup>-1</sup>). The energy profiles of the PPh<sub>3</sub>-catalyzed  $\gamma$ -[3 + 2] and  $\gamma$ -[2 + 4] cyclizations are shown in Figure S9. The  $\gamma$ -[3 + 2] cycloaddition starting with the *E*-type adduct **Pph-3'** is shown in Figure S10. The rate-determining step is the addition of PPh<sub>3</sub> to **1** in both  $\gamma$ -[3 + 2] cycloadditions starting from **Pph-3** and **Pph-3'**. The free energy of **Pph-ts3** is 24.2 kcal mol<sup>-1</sup>, and thereby lower than that of **Pph-ts3'**, being 28.3 kcal mol<sup>-1</sup>. Hence, the [3 + 2] cycloaddition starting from **Pph-3** dominates in kinetics.

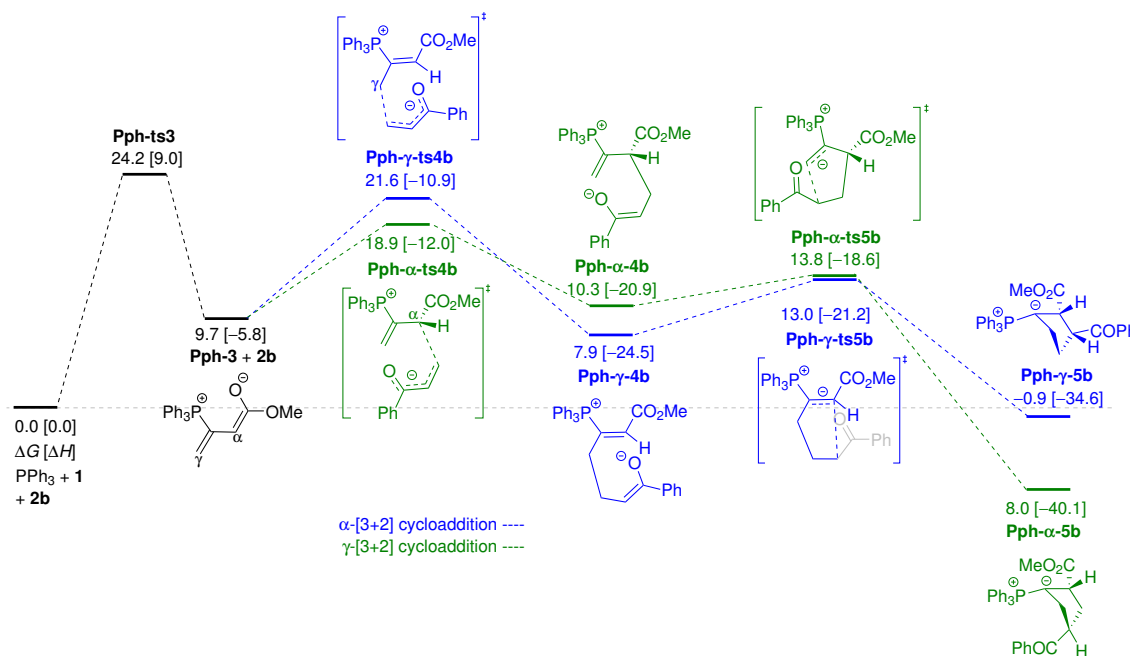

Figure S8: Energy profiles for the PPh<sub>3</sub>-catalyzed  $\alpha$ - and  $\gamma$ -[3 + 2] cycloadditions.

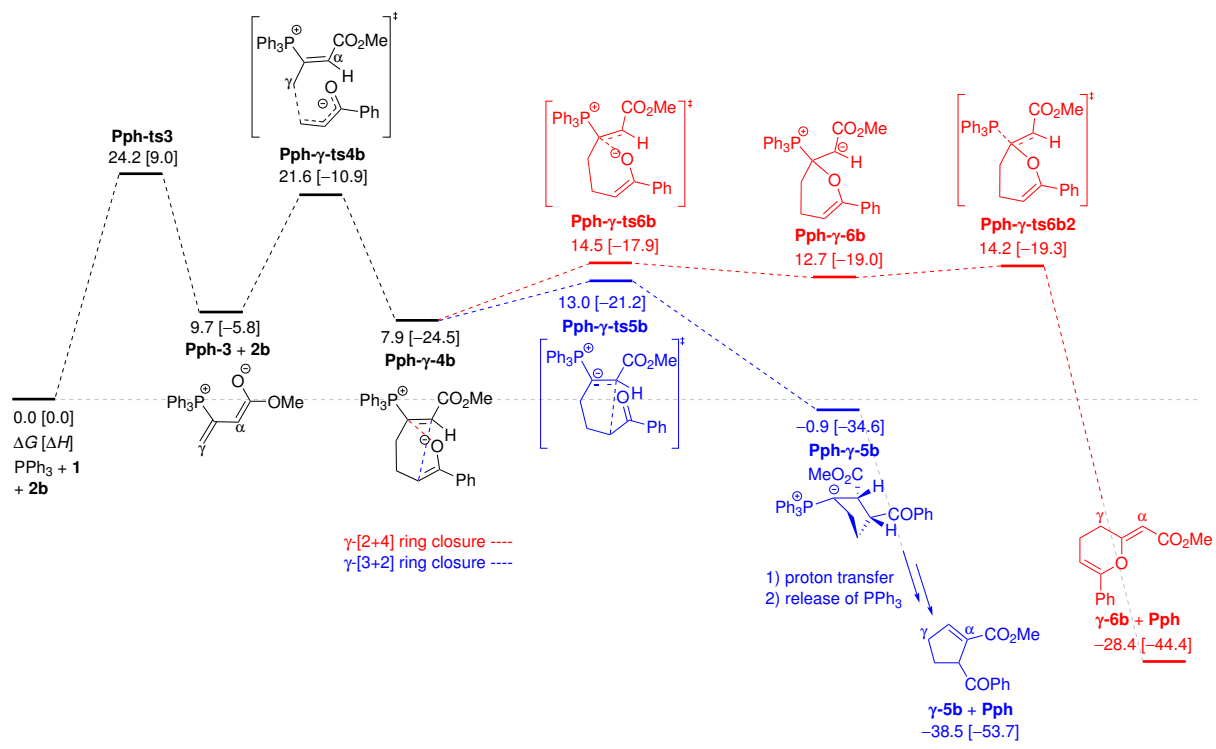

Figure S9: Energy profiles for the PPh<sub>3</sub>-catalyzed  $\gamma$ -[3 + 2] and  $\gamma$ -[2 + 4] cycloadditions.

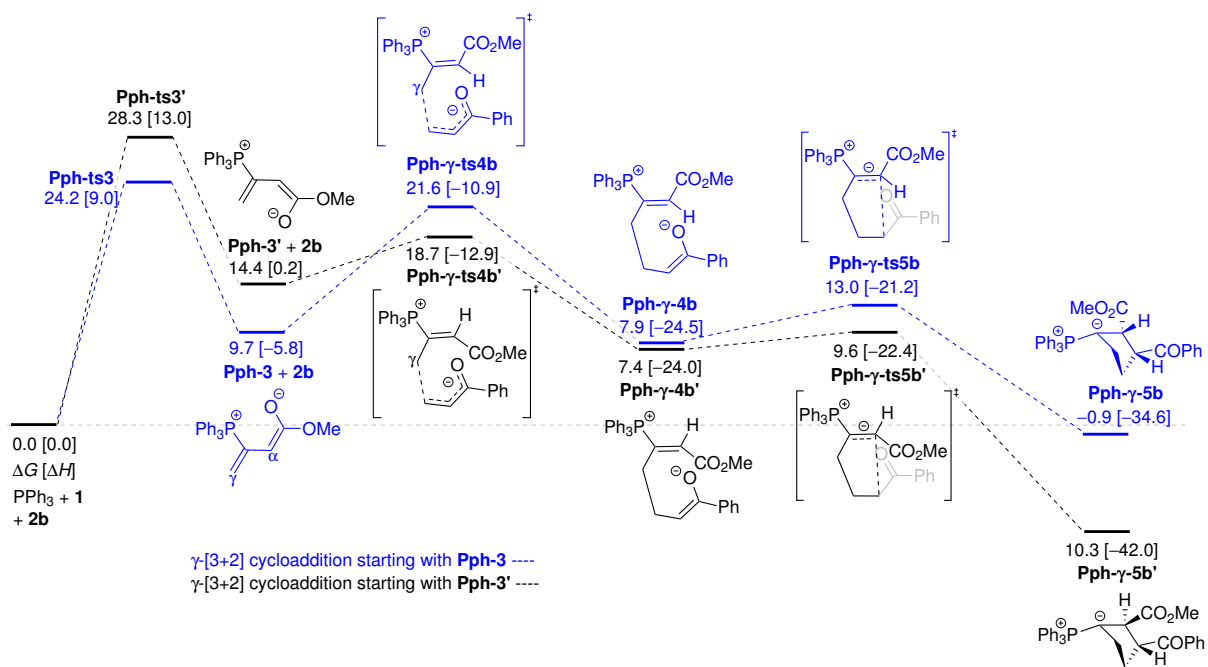

Figure S10: Energy profiles for the  $\text{PPh}_3$ -catalyzed  $\gamma$ -[3+2] cycloadditions starting from **Pph-3** and **Pph-3'**.

Figure S11 shows the energy profiles for the  $\gamma$ -[2 + 4] cycloaddition starting from **Dabco-3** and **Dabco-3'**. The formation of **Dabco-3** is more favorable than that of **Dabco-3'**. However, the rate-determining step (rds) is the Michael addition of **Dabco-3/Dabco-3'** to **2b** in the overall reaction. The activation energy of **Dabco- $\gamma$ -ts4b'**, being 23.8 kcal mol<sup>-1</sup>, is lower than that of **Dabco- $\gamma$ -ts4b**, being 25.1 kcal mol<sup>-1</sup>. The calculations show that the formation of *E*-form dihydropyran products  **$\gamma$ -6b'** is kinetically more favorable, which agrees with experimental observation.<sup>1-4</sup>

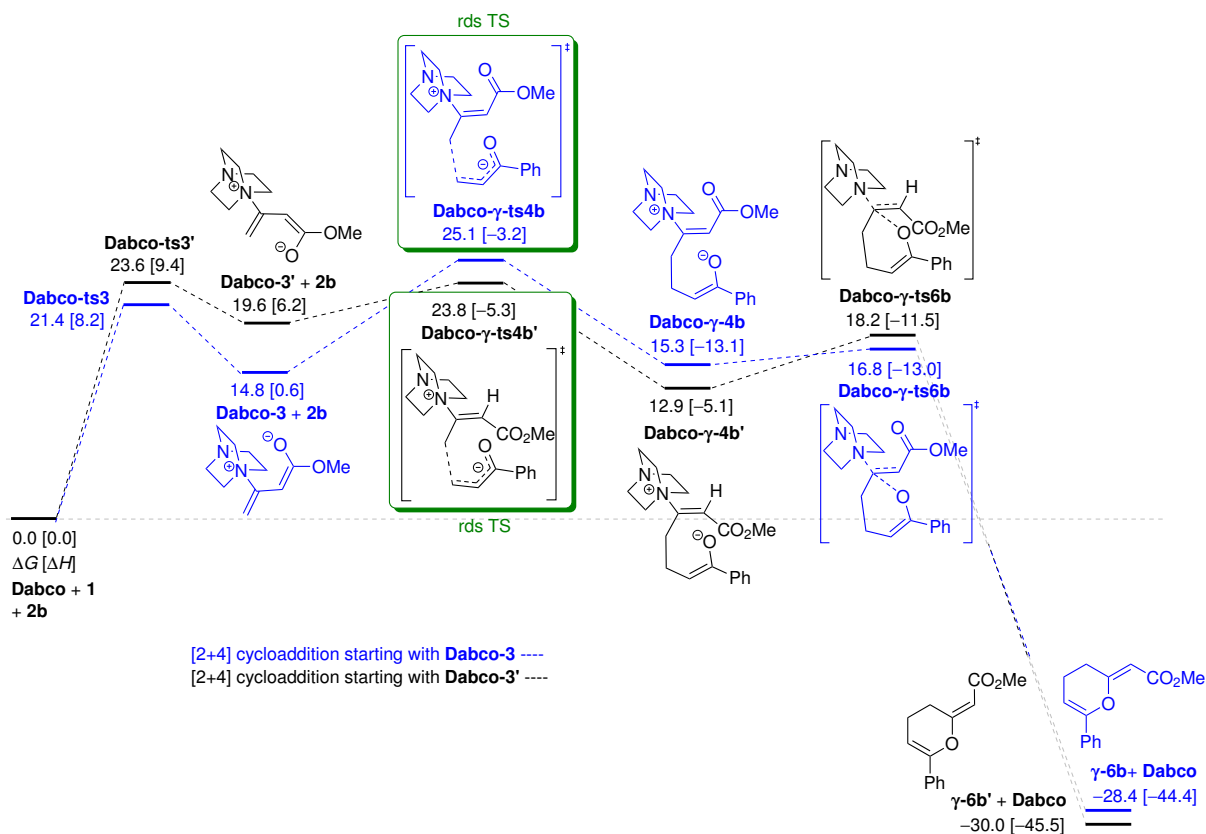

Figure S11: Energy profiles for the DABCO-catalyzed  $\gamma$ -[2 + 4] cycloadditions starting from **Dabco-3** and **Dabco-3'**.

## 8 Cycloadditions with ketone **2c**

Figure S12 shows the energy profiles and mechanism for the DABCO-catalyzed  $\gamma$ -[2 + 2],  $\gamma$ -[3 + 2] and  $\gamma$ -[2 + 2 + 2] cycloadditions of methyl allenoate **1** and ketone **2c**. The highest barrier along the  $\gamma$ -[2 + 2] pathway is 26.2 kcal mol<sup>-1</sup>. The  $\gamma$ -[2 + 2] pathway is kinetically more favorable than the  $\gamma$ -[3 + 2] and  $\gamma$ -[2 + 2 + 2] pathways with barriers of 35.2 and 28.3 kcal mol<sup>-1</sup>.

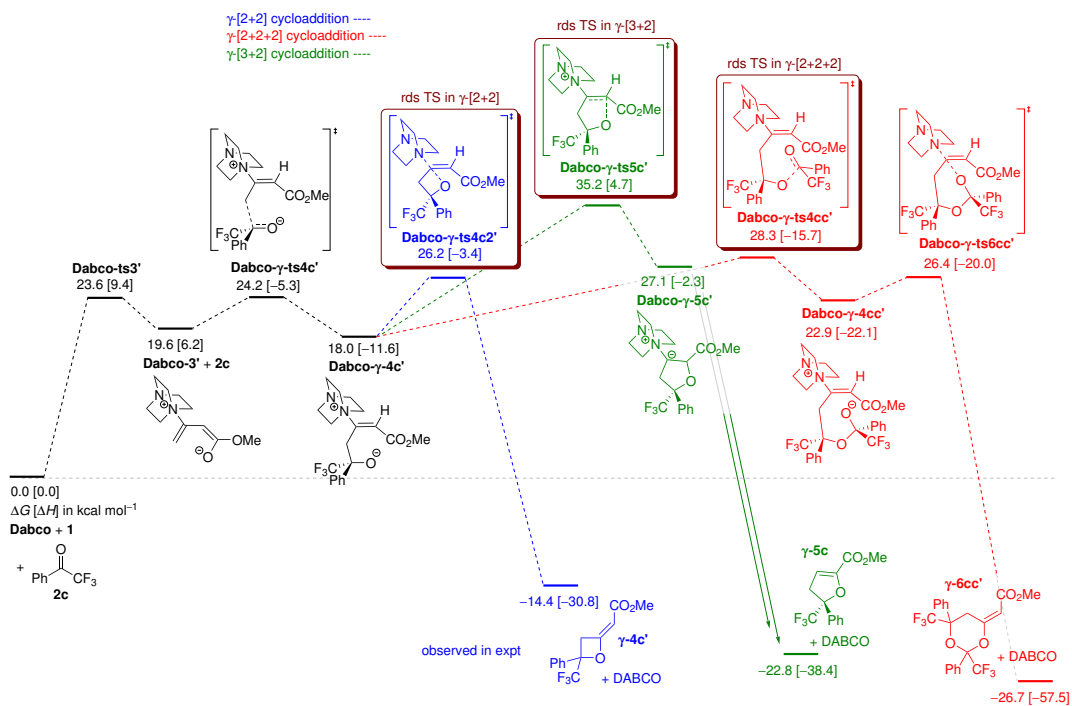

Figure S12: Energy profiles for the DABCO-catalyzed  $\gamma$ -[2 + 2],  $\gamma$ -[3 + 2] and  $\gamma$ -[2 + 2 + 2] cycloadditions of **1** and ketone **2c**.

Figure S13 shows the energy profiles and the mechanism for the NHC-catalyzed  $\gamma$ -[2 + 2],  $\gamma$ -[3 + 2] and  $\gamma$ -[2 + 2 + 2] cycloadditions of methyl allenoate **1** and ketone **2c**. The highest barrier along the  $\gamma$ -[2 + 2] pathway is 5.3 kcal mol<sup>-1</sup> higher than that along the  $\gamma$ -[2 + 2 + 2] pathway. In regard of the stereochemistry of the [2 + 2 + 2] cycloaddition, the formation of the *trans*-product with the two trifluoromethyl groups on the same sides of the dioxane ring is kinetically more favorable than the formation of the [2 + 2 + 2] *cis*-product (Figure S14).

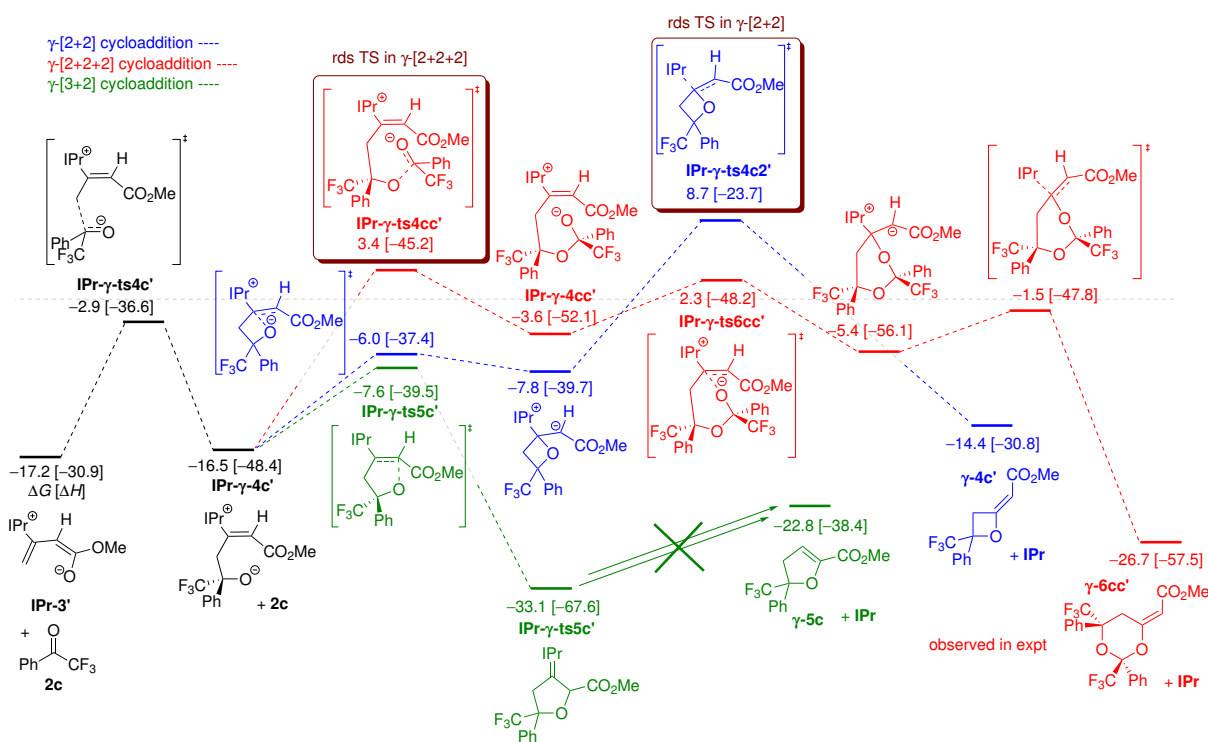

Figure S13: Energy profiles for the IPr-catalyzed  $\gamma$ -[2 + 2],  $\gamma$ -[3 + 2] and  $\gamma$ -[2 + 2 + 2] cycloadditions of **1** and ketone **2c**.

[2+2+2] cycloaddition yielding *trans*-products ----  
 [2+2+2] cycloaddition yielding *cis*-products ----

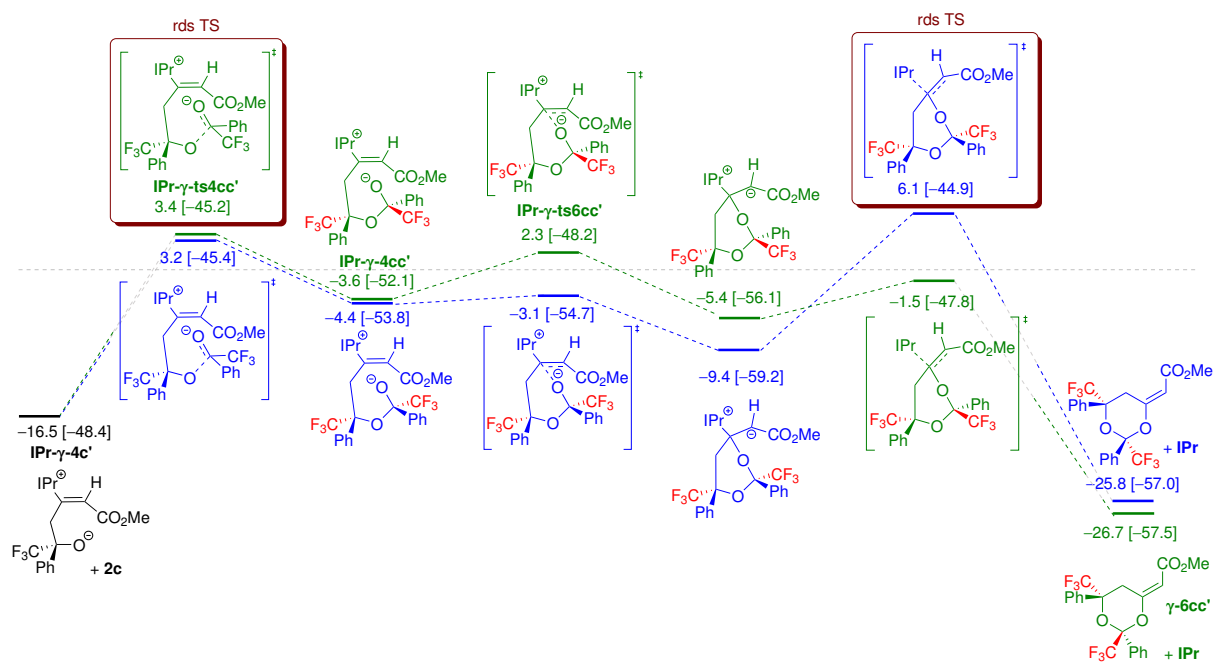

Figure S14: Energy profiles for the IPr-catalyzed  $\gamma$ -[2+2+2] cycloadditions, yielding *trans*- and *cis*-products.



Figure S15 shows the structure of **IPr- $\gamma$ -5c'**. **IPr** and the trifluoromethyl group block the access to  $C_\alpha$  and  $C_\beta$  which might aid the generally unfavorable [1,2] proton transfer.

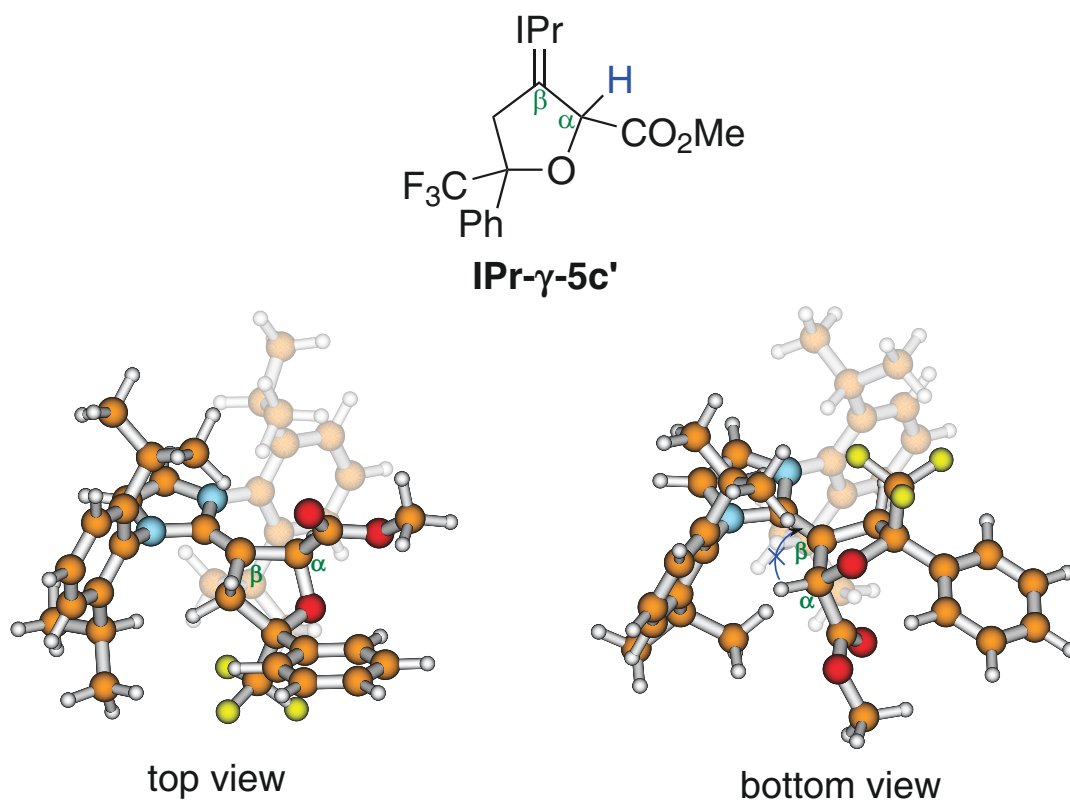

Figure S15: Geometry of **IPr- $\gamma$ -5c'**.





|   |          |           |           |            |           |             |           |
|---|----------|-----------|-----------|------------|-----------|-------------|-----------|
| C | 2.270531 | 1.250205  | 0.043654  | E(ele)     | -         | -344.395985 |           |
| H | 3.340237 | 1.061740  | -0.054622 | E(ele+zpe) | -         | -344.295156 |           |
| H | 1.983537 | 1.962754  | -0.737240 | H          | -         | -344.286572 |           |
| H | 2.086164 | 1.714937  | 1.023448  | G          | -         | -344.327549 |           |
| C | 2.270579 | -1.250188 | 0.043461  | C          | -0.783242 | -0.809212   | -0.000911 |
| H | 2.086557 | -1.714900 | 1.023332  | H          | -0.622834 | -1.883450   | -0.001713 |
| H | 1.983301 | -1.962746 | -0.737314 | C          | -1.992032 | -0.298039   | -0.000102 |
| H | 3.340251 | -1.061737 | -0.055215 | C          | -3.189211 | 0.213336    | 0.000877  |

**Py**

|            |           |             |           |
|------------|-----------|-------------|-----------|
| E(ele)     | -         | -248.180089 |           |
| E(ele+zpe) | -         | -248.090298 |           |
| H          | -         | -248.085096 |           |
| G          | -         | -248.117692 |           |
| C          | 1.139571  | -0.721256   | -0.000001 |
| C          | -1.139550 | -0.721290   | 0.000001  |
| C          | 1.196383  | 0.671955    | 0.000001  |
| H          | 2.054596  | -1.309255   | 0.000002  |
| C          | -1.196403 | 0.671919    | -0.000001 |
| H          | -2.054557 | -1.309317   | -0.000001 |
| C          | -0.000021 | 1.383282    | 0.000000  |
| H          | 2.155676  | 1.179725    | 0.000002  |
| H          | -2.155711 | 1.179652    | -0.000002 |
| N          | 0.000022  | -1.416867   | 0.000000  |
| H          | -0.000037 | 2.469601    | 0.000000  |

**Dbu**

|            |           |             |           |
|------------|-----------|-------------|-----------|
| E(ele)     | -         | -461.888397 |           |
| E(ele+zpe) | -         | -461.639337 |           |
| H          | -         | -461.628629 |           |
| G          | -         | -461.674797 |           |
| C          | 2.133255  | 1.176928    | 0.339080  |
| C          | 0.968804  | 1.581340    | -0.609229 |
| C          | -0.322860 | 0.822912    | -0.389755 |
| C          | 1.922981  | -0.126533   | 1.119123  |
| C          | 1.890506  | -1.379605   | 0.240124  |
| C          | 0.971700  | -1.191749   | -0.976963 |
| H          | 3.066815  | 1.106869    | -0.234343 |
| H          | 0.714499  | 2.633149    | -0.470216 |
| H          | 0.982562  | -0.053611   | 1.680809  |
| H          | 1.557319  | -2.236324   | 0.839636  |
| H          | 2.279794  | 1.982002    | 1.066279  |
| H          | 1.271622  | 1.467383    | -1.656644 |
| H          | 2.718114  | -0.231075   | 1.866324  |
| H          | 2.899321  | -1.620970   | -0.120104 |
| H          | 0.732882  | -2.157824   | -1.436182 |
| H          | 1.486889  | -0.608746   | -1.745413 |
| C          | -2.580053 | 0.712811    | 0.163185  |
| C          | -2.298419 | -0.664675   | 0.759217  |
| C          | -1.354054 | -1.415421   | -0.169315 |
| H          | -3.259235 | 1.283873    | 0.803260  |
| H          | -1.830624 | -0.532654   | 1.742497  |
| H          | -3.218293 | -1.241419   | 0.900223  |
| H          | -0.899306 | -2.265005   | 0.357653  |
| H          | -1.904248 | -1.821340   | -1.030208 |
| H          | -3.080483 | 0.594800    | -0.811277 |
| N          | -0.285864 | -0.537475   | -0.648483 |
| N          | -1.358249 | 1.481024    | -0.009387 |

**Mbd**

|            |           |             |           |
|------------|-----------|-------------|-----------|
| E(ele)     | -         | -477.929684 |           |
| E(ele+zpe) | -         | -477.692770 |           |
| H          | -         | -477.681858 |           |
| G          | -         | -477.727838 |           |
| C          | -2.328423 | 1.100941    | 0.201622  |
| C          | -0.054751 | 0.472966    | -0.040925 |
| C          | -1.713025 | -1.284421   | 0.175151  |
| C          | -2.685580 | -0.260942   | -0.383532 |
| H          | -2.643216 | 1.145356    | 1.254831  |
| H          | -2.879216 | 1.894722    | -0.315688 |
| H          | -1.884129 | -2.276270   | -0.258741 |
| H          | -1.842445 | -1.374664   | 1.268950  |
| H          | -2.590135 | -0.238451   | -1.475562 |
| H          | -3.716307 | -0.538570   | -0.138024 |
| C          | 2.327153  | -0.093648   | 0.203478  |
| C          | 2.016222  | -1.500788   | -0.272039 |
| C          | 0.641128  | -1.887564   | 0.236427  |
| H          | 3.273980  | 0.255896    | -0.220539 |
| H          | 2.026609  | -1.526778   | -1.366968 |
| H          | 2.767026  | -2.204743   | 0.101189  |
| H          | 0.325391  | -2.850017   | -0.182391 |
| H          | 0.666392  | -2.003380   | 1.336015  |
| H          | 2.437295  | -0.080238   | 1.304098  |
| N          | -0.348961 | -0.894459   | -0.151301 |
| N          | -0.912934 | 1.413302    | 0.124356  |
| N          | 1.284557  | 0.822895    | -0.231513 |
| C          | 1.603069  | 2.227090    | -0.038768 |
| H          | 0.913061  | 2.842167    | -0.614321 |
| H          | 1.526548  | 2.528112    | 1.016878  |
| H          | 2.625758  | 2.392893    | -0.388998 |

**s-trans methyl allenolate 1**

|            |           |             |           |
|------------|-----------|-------------|-----------|
| E(ele)     | -         | -344.396253 |           |
| E(ele+zpe) | -         | -344.295473 |           |
| H          | -         | -344.286854 |           |
| G          | -         | -344.327977 |           |
| C          | -0.856377 | 0.995681    | -0.000050 |
| H          | -1.026279 | 2.068358    | -0.000096 |
| C          | -1.855334 | 0.144463    | 0.000003  |
| C          | -2.851116 | -0.695386   | 0.000050  |
| H          | -3.274034 | -1.059942   | 0.932162  |
| H          | -3.274099 | -1.059937   | -0.932038 |
| C          | 0.569529  | 0.583490    | -0.000034 |
| O          | 0.731472  | -0.747932   | -0.000101 |
| C          | 2.088119  | -1.193026   | 0.000033  |
| H          | 2.606357  | -0.829384   | -0.890377 |
| H          | 2.606310  | -0.828964   | 0.890295  |
| H          | 2.038110  | -2.280774   | 0.000280  |
| O          | 1.487868  | 1.370347    | 0.000072  |

**s-cis methyl allenolate 1**





|   |           |           |           |
|---|-----------|-----------|-----------|
| C | 0.191923  | -0.499866 | 2.383498  |
| C | 1.668752  | -0.249386 | 2.123629  |
| H | -1.285851 | -1.966625 | 1.775979  |
| H | -0.404693 | 0.341503  | 2.008950  |
| H | 0.011923  | -0.595488 | 3.458648  |
| H | 1.939558  | 0.778720  | 2.397427  |
| H | -2.289591 | -0.927140 | 2.726574  |
| H | 0.347714  | -2.627844 | 1.999045  |
| N | 1.980298  | -0.442453 | 0.707967  |
| N | 0.006869  | -1.607194 | 0.205263  |
| C | -1.773934 | -1.699911 | -0.816164 |
| C | -2.624406 | -0.833735 | -0.213841 |
| H | -3.478272 | -1.196093 | 0.348188  |
| C | -1.552832 | -2.652274 | -1.700863 |
| C | -2.311664 | 0.572906  | -0.194281 |
| O | -1.339647 | 1.105457  | -0.713972 |
| O | -3.221681 | 1.296904  | 0.511313  |
| H | -2.278877 | -2.795255 | -2.496928 |
| H | -0.680121 | -3.292573 | -1.661005 |
| C | -2.971745 | 2.694743  | 0.566317  |
| H | -2.013258 | 2.898164  | 1.053316  |
| H | -2.952133 | 3.124504  | -0.438822 |
| H | -3.790497 | 3.119543  | 1.147269  |

  

| Mdb-3      |           |           |             |
|------------|-----------|-----------|-------------|
| E(ele)     |           |           | -822.354812 |
| E(ele+zpe) |           |           | -822.011430 |
| H          |           |           | -821.993217 |
| G          |           |           | -822.055411 |
| C          | 1.323858  | 1.967646  | -1.101199   |
| C          | 0.932244  | 0.011251  | 0.355080    |
| C          | 1.885468  | -0.299226 | -1.839837   |
| C          | 2.400238  | 1.123678  | -1.754374   |
| H          | 0.496157  | 2.133110  | -1.801420   |
| H          | 1.705006  | 2.945192  | -0.796200   |
| H          | 2.625712  | -0.965350 | -2.292260   |
| H          | 0.947481  | -0.357167 | -2.409816   |
| H          | 3.327408  | 1.142279  | -1.170701   |
| H          | 2.615605  | 1.522950  | -2.749897   |
| C          | 0.152196  | -1.910744 | 1.604843    |
| C          | 1.278256  | -2.728177 | 0.998434    |
| C          | 1.507403  | -2.239669 | -0.418732   |
| H          | 0.009120  | -2.154412 | 2.659841    |
| H          | 2.186659  | -2.603438 | 1.598442    |
| H          | 1.021154  | -3.791618 | 0.979866    |
| H          | 2.419322  | -2.674946 | -0.839605   |
| H          | 0.655401  | -2.517186 | -1.055690   |
| H          | -0.794030 | -2.081215 | 1.074753    |
| N          | 1.650556  | -0.784280 | -0.482652   |
| N          | 0.752166  | 1.318476  | 0.091091    |
| N          | 0.497417  | -0.493173 | 1.527232    |
| C          | -0.480631 | 1.989688  | 0.525898    |
| C          | -1.717743 | 1.320838  | 0.282660    |
| H          | -2.607569 | 1.802541  | 0.671463    |
| C          | -0.310650 | 3.219682  | 1.067408    |
| C          | -1.910010 | 0.156368  | -0.472740   |
| O          | -1.067850 | -0.574262 | -1.045206   |
| O          | -3.241228 | -0.200878 | -0.546672   |
| H          | -1.168955 | 3.835746  | 1.309488    |
| H          | 0.679126  | 3.611823  | 1.276383    |
| C          | -3.519396 | -1.360939 | -1.305504   |
| H          | -3.162505 | -1.258386 | -2.334722   |
| H          | -3.052069 | -2.248736 | -0.864772   |
| H          | -4.605310 | -1.469997 | -1.292703   |
| C          | 0.201607  | 0.326407  | 2.696440    |
| H          | 0.758462  | 1.259949  | 2.647268    |
| H          | -0.866702 | 0.557125  | 2.767346    |
| H          | 0.525115  | -0.235116 | 3.578006    |

  

| Dbu-3      |           |           |             |
|------------|-----------|-----------|-------------|
| E(ele)     |           |           | -806.315710 |
| E(ele+zpe) |           |           | -805.960047 |
| H          |           |           | -805.941926 |
| G          |           |           | -806.004394 |
| C          | -0.503420 | -1.679967 | -1.575121   |
| C          | -0.782214 | -0.171380 | -1.817542   |
| C          | -0.977372 | 0.586119  | -0.530966   |
| C          | -1.075695 | -2.276271 | -0.283067   |
| C          | -2.585847 | -2.114241 | -0.090110   |
| C          | -3.057473 | -0.664504 | -0.290384   |
| H          | -0.871933 | -2.231921 | -2.448649   |
| H          | 0.045839  | 0.275285  | -2.365905   |
| H          | -0.542598 | -1.822028 | 0.559426    |
| H          | -2.848992 | -2.451494 | 0.919822    |
| H          | 0.583093  | -1.810120 | -1.545127   |
| H          | -1.678262 | -0.033765 | -2.430117   |
| H          | -0.829521 | -3.343949 | -0.258048   |
| H          | -3.144539 | -2.748964 | -0.789598   |
| H          | -3.987323 | -0.472243 | 0.252132    |
| H          | -3.273577 | -0.470732 | -1.342854   |
| C          | -0.129830 | 2.072666  | 1.208559    |
| C          | -0.940748 | 1.207240  | 2.156858    |
| C          | -2.281800 | 0.880865  | 1.523185    |
| H          | 0.908925  | 2.144162  | 1.538091    |
| H          | -0.381398 | 0.285997  | 2.341897    |
| H          | -1.096008 | 1.735354  | 3.102949    |
| H          | -2.813891 | 0.129182  | 2.114282    |
| H          | -2.921153 | 1.771468  | 1.452345    |
| H          | -0.540534 | 3.086044  | 1.118855    |
| N          | -2.083376 | 0.323023  | 0.182730    |
| N          | -0.090011 | 1.467282  | -0.128836   |
| C          | 1.125558  | 1.737480  | -0.900882   |
| C          | 2.193610  | 0.821178  | -0.710653   |
| H          | 3.095732  | 0.078667  | -1.289515   |
| C          | 1.058438  | 2.841271  | -1.685516   |
| C          | 2.188818  | -0.244244 | 0.209096    |
| O          | 1.307579  | -0.576939 | 1.027766    |
| O          | 3.344787  | -0.991251 | 0.141904    |
| H          | 1.918593  | 3.157837  | -2.264947   |
| H          | 0.149351  | 3.429092  | -1.744128   |
| C          | 3.415226  | -2.079931 | 1.042972    |
| H          | 3.324244  | -1.732264 | 2.089110    |
| H          | 2.622598  | -2.809978 | 0.846143    |
| H          | 4.392568  | -2.537125 | 0.879635    |

  

| Mdb-ts3    |           |           |             |
|------------|-----------|-----------|-------------|
| E(ele)     |           |           | -822.317891 |
| E(ele+zpe) |           |           | -821.978092 |
| H          |           |           | -821.959478 |
| G          |           |           | -822.023226 |
| C          | -0.121336 | 1.695896  | 1.940823    |
| C          | -1.102174 | 0.323234  | 0.213796    |
| C          | -0.296464 | -0.732644 | 2.224623    |
| C          | -0.525153 | 0.597120  | 2.917291    |
| H          | 0.973911  | 1.781542  | 1.950450    |
| H          | -0.525296 | 2.664070  | 2.260845    |
| H          | -0.577813 | -1.574796 | 2.864451    |
| H          | 0.764543  | -0.854894 | 1.947500    |
| H          | -1.584485 | 0.674609  | 3.187304    |
| H          | 0.067074  | 0.670596  | 3.835358    |
| C          | -1.986336 | -1.053746 | -1.625349   |
| C          | -2.384540 | -2.099127 | -0.600948   |
| C          | -1.338589 | -2.118428 | 0.495153    |
| H          | -2.786329 | -0.914413 | -2.359246   |
| H          | -3.364086 | -1.850838 | -0.176930   |
| H          | -2.451548 | -3.084885 | -1.071804   |
| H          | -1.649642 | -2.769245 | 1.319614    |
| H          | -0.381161 | -2.488845 | 0.096625    |
| H          | -1.074625 | -1.355751 | -2.158680   |
| N          | -1.147795 | -0.781186 | 1.048653    |
| N          | -0.544351 | 1.467200  | 0.563032    |
| N          | -1.769974 | 0.233408  | -0.975019   |
| C          | 1.049837  | 2.016097  | -0.549598   |
| C          | 2.085416  | 1.164635  | -0.298871   |
| H          | 2.955671  | 1.526271  | 0.238902    |
| C          | 0.688498  | 3.168203  | -1.082272   |
| C          | 1.996085  | -0.238238 | -0.583690   |
| O          | 1.045304  | -0.828278 | -1.091202   |
| O          | 3.110931  | -0.915435 | -0.193160   |
| H          | 1.329909  | 3.608174  | -1.841783   |
| H          | -0.217884 | 3.687317  | -0.797010   |
| C          | 3.105119  | -2.309310 | -0.464311   |
| H          | 2.296071  | -2.808645 | 0.077618    |
| H          | 2.979367  | -2.496012 | -1.534279   |
| H          | 4.071236  | -2.681398 | -0.123153   |
| C          | -1.861792 | 1.380587  | -1.056883   |
| H          | -1.885751 | 2.291531  | -1.261608   |
| H          | -1.014382 | 1.429902  | -2.550513   |
| H          | -2.791234 | 1.293799  | -2.429006   |







```

H 0.122511 -2.709809 -1.085859
H -1.330197 -1.100637 -2.259908
H -2.155532 -2.669472 -2.264529
H -3.624284 -0.678426 -1.574253
H -3.605915 -2.021948 -0.419336
H -1.207044 -3.181820 -0.009082
N -2.520991 -0.314267 0.154956
N -0.412653 -1.261472 0.277624
C 1.015358 -1.158139 0.620901
C 1.675973 -0.233842 -0.225260
H 1.119137 0.272605 -1.006383
C 1.417727 -1.969348 1.631499
C 3.065206 0.022347 -0.101851
O 3.851061 -0.476178 0.701858
O 3.505936 0.961512 -1.011518
H 2.461748 -2.003176 1.912187
H 0.694266 -2.586693 2.154514
C 4.888116 1.259313 -0.934596
H 5.149661 1.652747 0.052555
H 5.494245 0.367407 -1.121330
H 5.077115 2.011081 -1.703144

```

**Mdb-ts3'**

```

E(ele) - -822.313257
E(ele+zpe) - -821.973741
H - -821.954785
G - -822.020377
C -2.520862 -1.520654 -0.431796
C -1.094086 0.185767 0.502294
C -2.501425 0.738441 -1.396841
C -3.406474 -0.368059 -0.884009
H -2.103060 -2.019080 -1.318601
H -3.107234 -2.275393 0.105148
H -3.078528 1.619236 -1.696894
H -1.928593 0.397233 -2.273703
H -4.004606 0.014485 -0.048754
H -4.092067 -0.699197 -1.670686
C 0.606738 1.779293 1.282226
C -0.290547 2.897354 0.783077
C -0.958819 2.449089 -0.503077
H 1.012564 2.018799 2.268891
H -1.051289 3.123399 1.538570
H 0.293975 3.804064 0.600566
H -1.729147 3.164334 -0.811910
H -0.216488 2.383431 -1.313982
H 1.459639 1.618211 0.606503
N -1.603739 1.153226 -0.325873
N -1.424027 -1.093136 0.429929
N -0.160634 0.546272 1.414830
C 0.162119 -2.065519 -0.106409
C 0.918143 -1.310411 -0.969045
H 0.513778 -1.009810 -1.932666
C 0.050205 -3.226065 0.513135
C 2.135825 -0.688250 -0.540215
O 2.747161 -0.845091 0.510927
O 2.604749 0.194935 -1.484427
H 0.728712 -4.027291 0.234173
H -0.680157 -3.400416 1.295201
C 3.878184 0.754245 -1.198797
H 3.853714 1.343668 -0.277065
H 4.630677 -0.030999 -1.084929
H 4.120924 1.391515 -2.050055
C 0.297717 -0.393342 2.433373
H -0.479749 -1.135272 2.608692
H 1.223128 -0.890537 2.121964
H 0.477002 0.174996 3.351833

```

**Mdb-3'**

```

E(ele) - -822.335268
E(ele+zpe) - -821.993063
H - -821.973996
G - -822.040534
C 1.139745 2.444856 -0.045529
C 1.258114 -0.004611 0.254744
C 2.493295 1.043489 -1.536729
C 2.513045 2.301969 -0.683311
H 0.418712 2.832057 -0.773522
H 1.160834 3.138630 0.799472
H 3.447827 0.875869 -2.041528
H 1.704250 1.100730 -2.298743
H 3.299132 2.205683 0.074507
H 2.730358 3.188998 -1.285525
C 1.327637 -2.394331 0.432125
C 2.826271 -2.363183 0.172184
C 3.115871 -1.267730 -0.843886
H 1.066909 -3.151935 1.172806
H 3.341056 -2.159970 1.116889
H 3.187675 -3.321119 -0.212548
H 4.162671 -0.945915 -0.784984
H 2.941540 -1.641803 -1.861215
H 0.761972 -2.610905 -0.485110
N 2.257700 -0.097910 -0.655135
N 0.608548 1.157020 0.426984
C 0.931311 -1.096898 0.966607
C -0.857502 1.144125 0.607066
C -1.501194 0.290015 -0.328305
H -0.925775 -0.158457 -1.132333
C -1.336906 1.955983 1.581971
C -2.891082 0.032533 -0.275716
O -3.713584 0.469216 0.529998
O -3.297659 -0.837653 -1.275543
H -2.404480 2.061433 1.717628
H -0.656214 2.482218 2.244744
C -4.686051 -1.111171 -1.289526
H -5.009611 -1.566798 -0.348428
H -5.266740 -0.196228 -1.444690
H -4.846860 -1.803519 -2.118417
C 0.067264 -1.063764 2.143441
H 0.155815 -0.098235 2.637895
H -0.981399 -1.216413 1.866405
H 0.408324 -1.851389 2.820672

```



Table with columns for labels (E(ele), E(ele+zpe), H, G, C, O, N, F, P, M) and values. The table is organized into sections by chemical group: Dabc0-3-H4, Dmap-3-H4, Hmpt-3-H4, and Py-3-H4, with sub-sections for Quin-3-H4. Each entry includes the label, the value, and the corresponding element symbol.

|            |           |             |           |           |           |           |           |
|------------|-----------|-------------|-----------|-----------|-----------|-----------|-----------|
| E(ele)     | -         | -806.750699 | H         | -3.738323 | -0.388329 | -2.469660 |           |
| E(ele+zpe) | -         | -806.380752 | H         | -3.482456 | -1.799253 | -0.269882 |           |
| H          | -         | -806.362541 | H         | -2.317862 | -2.079650 | -1.575449 |           |
| G          | -         | -806.425485 | H         | -1.249352 | 0.168331  | -2.544095 |           |
| C          | -0.542633 | -1.743489   | -1.606177 | N         | -1.565920 | -1.042769 | 0.057424  |
| C          | -0.806725 | -0.233514   | -1.879291 | N         | -0.128715 | 0.417878  | 1.192604  |
| C          | -0.973030 | 0.573482    | -0.616099 | N         | -1.296250 | 1.143472  | -0.697589 |
| C          | -0.951361 | -2.228952   | -0.210153 | C         | 0.948320  | 1.352510  | 0.986657  |
| C          | -2.445776 | -2.095356   | 0.100803  | C         | 1.701448  | 1.299232  | -0.326405 |
| C          | -3.005460 | -0.711680   | -0.259675 | H         | 2.560875  | 1.968659  | -0.273170 |
| H          | -1.063799 | -2.326010   | -2.373177 | C         | 1.318699  | 2.158046  | 1.981533  |
| H          | -0.015737 | 0.204724    | -2.487129 | C         | 2.163354  | -0.102069 | -0.683089 |
| H          | -0.371672 | -1.680436   | 0.546752  | O         | 1.440883  | -1.078072 | -0.664504 |
| H          | -2.610636 | -2.298390   | 1.164802  | O         | 3.438528  | -0.126700 | -1.041141 |
| H          | 0.552185  | -1.946121   | -1.735319 | H         | 2.193248  | 2.791582  | 1.884318  |
| H          | -1.721715 | -0.101867   | -2.462987 | H         | 0.767915  | 2.205729  | 2.915939  |
| H          | -0.658193 | -3.278339   | -0.105846 | C         | 3.962808  | -1.403310 | -1.444857 |
| H          | -3.021103 | -2.844132   | -0.455294 | H         | 3.882780  | -2.114992 | -0.621371 |
| H          | -3.939983 | -0.509054   | 0.267889  | H         | 3.408955  | -1.774723 | -2.308902 |
| H          | -3.231745 | -0.642117   | -1.324705 | H         | 5.003971  | -1.218896 | -1.699456 |
| C          | -0.222167 | 2.284555    | 0.965998  | C         | -1.421226 | 2.542785  | -0.270129 |
| C          | -0.991462 | 1.493482    | 2.007065  | H         | -1.395454 | 2.624125  | 0.812251  |
| C          | -2.299007 | 1.008707    | 1.412727  | H         | -0.651317 | 3.166313  | -0.737107 |
| H          | 0.778622  | 2.526205    | 1.321471  | H         | -2.406781 | 2.908888  | -0.573219 |
| H          | -0.378953 | 0.646731    | 2.330500  | H         | 1.068747  | 1.635691  | -1.157136 |
| H          | -1.192520 | 2.123669    | 2.877044  |           |           |           |           |
| H          | -2.766502 | 0.264410    | 2.063024  |           |           |           |           |
| H          | -3.012051 | 1.828955    | 1.269332  |           |           |           |           |
| H          | -0.742475 | 3.211723    | 0.697062  |           |           |           |           |
| N          | -2.057398 | 0.362953    | 0.108941  |           |           |           |           |
| N          | -0.055699 | 1.468837    | -0.257826 |           |           |           |           |
| C          | 1.196202  | 1.632159    | -0.967608 |           |           |           |           |
| C          | 2.154465  | 0.463964    | -0.973940 |           |           |           |           |
| H          | 3.170018  | 0.837848    | -1.148240 |           |           |           |           |
| C          | 1.470821  | 2.813663    | -1.512778 |           |           |           |           |
| C          | 2.176258  | -0.312893   | 0.327625  |           |           |           |           |
| O          | 1.801315  | 0.119778    | 1.394026  |           |           |           |           |
| O          | 2.673074  | -1.533431   | 0.246785  |           |           |           |           |
| H          | 2.435055  | 3.000375    | -1.974027 |           |           |           |           |
| H          | 0.747742  | 3.623695    | -1.510660 |           |           |           |           |
| C          | 2.832626  | -2.331585   | 1.331555  |           |           |           |           |
| H          | 3.503187  | -1.829070   | 2.030743  |           |           |           |           |
| H          | 1.862242  | -2.492715   | 1.805963  |           |           |           |           |
| C          | 3.259706  | -3.272248   | 0.991067  |           |           |           |           |
| H          | 1.954691  | -0.234976   | -1.792869 |           |           |           |           |

**Mibd-3-H<sub>2</sub>**

|            |           |             |           |
|------------|-----------|-------------|-----------|
| E(ele)     | -         | -822.800882 |           |
| E(ele+zpe) | -         | -822.443191 |           |
| H          | -         | -822.424269 |           |
| G          | -         | -822.488968 |           |
| C          | 1.213674  | 2.266805    | -0.773559 |
| C          | 0.886123  | 0.026965    | 0.290890  |
| C          | 1.856495  | 0.164935    | -1.892170 |
| C          | 2.317645  | 1.576116    | -1.564588 |
| H          | 0.470145  | 2.675090    | -1.465601 |
| H          | 1.611705  | 3.088370    | -0.170468 |
| H          | 2.604742  | -0.382563   | -2.467890 |
| H          | 0.908033  | 0.157902    | -2.444831 |
| H          | 3.245829  | 1.522606    | -0.986984 |
| H          | 2.520252  | 2.151575    | -2.471652 |
| C          | 0.637438  | -2.117256   | 1.345987  |
| C          | 2.042999  | -2.465115   | 0.879857  |
| C          | 2.232476  | -1.890096   | -0.513471 |
| H          | 0.438230  | -2.490218   | 2.351526  |
| H          | 2.772043  | -2.042627   | 1.579332  |
| H          | 2.192076  | -3.547504   | 0.848372  |
| H          | 3.292578  | -1.839123   | -0.780678 |
| H          | 1.721609  | -2.511340   | -1.259416 |
| H          | -0.117587 | -2.531229   | 0.666842  |
| N          | 1.673665  | -0.537517   | -0.622600 |
| N          | 0.488632  | 1.323060    | 0.115757  |
| N          | 0.502121  | -0.656726   | 1.378810  |
| C          | -0.803946 | 1.769106    | 0.521727  |
| C          | -1.931861 | 1.069901    | 0.307793  |
| H          | -2.863666 | 1.472987    | 0.090012  |
| C          | -0.827660 | 3.128223    | 1.162883  |
| C          | -2.062483 | -0.175205   | -0.484221 |
| O          | -1.174349 | -0.736761   | -1.100174 |
| O          | -3.325002 | -0.597580   | -0.471890 |
| H          | -1.804341 | 3.324786    | 1.607760  |
| H          | -0.056347 | 3.216003    | 1.935576  |
| C          | -3.613374 | -1.759109   | -1.262577 |
| H          | -3.374657 | -1.565349   | -2.309903 |
| H          | -3.030350 | -2.610604   | -0.905230 |
| H          | -4.678438 | -1.939052   | -1.133865 |
| C          | 0.081137  | -0.035924   | 2.630762  |
| H          | 0.360623  | 1.017224    | 2.644431  |
| H          | -1.000310 | -0.124702   | 2.774907  |
| H          | 0.598983  | -0.537575   | 3.452304  |
| H          | -0.639248 | 3.912884    | 0.421324  |

**Dbu-3-H<sub>2</sub>**

|            |           |             |           |
|------------|-----------|-------------|-----------|
| E(ele)     | -         | -806.757197 |           |
| E(ele+zpe) | -         | -806.387330 |           |
| H          | -         | -806.368707 |           |
| G          | -         | -806.433337 |           |
| C          | -0.486900 | -1.740168   | -1.534566 |
| C          | -0.778643 | -0.237257   | -1.795933 |
| C          | -0.996382 | 0.530255    | -0.518834 |
| C          | -1.113408 | -2.321245   | -0.263309 |
| C          | -2.629432 | -2.141608   | -0.131633 |
| C          | -3.093733 | -0.687502   | -0.327202 |
| H          | -0.818821 | -2.299491   | -2.415537 |
| H          | 0.040365  | 0.206536    | -2.361626 |
| H          | -0.618055 | -1.875727   | 0.609668  |
| H          | -2.937701 | -2.496168   | 0.857796  |
| H          | 0.598973  | -1.873017   | -1.471176 |
| H          | -1.673707 | -0.124615   | -2.412240 |
| H          | -0.883489 | -3.390819   | -0.222222 |
| H          | -3.158810 | -2.761400   | -0.864173 |
| H          | -4.020882 | -0.491865   | 0.216001  |
| H          | -3.305377 | -0.474337   | -1.376106 |
| C          | -0.251508 | 2.135519    | 1.180382  |
| C          | -1.049012 | 1.280652    | 2.149929  |
| C          | -2.354892 | 0.863113    | 1.499923  |
| H          | 0.752338  | 2.328470    | 1.564385  |
| H          | -0.460092 | 0.398230    | 2.413546  |
| H          | -1.256195 | 1.849358    | 3.059811  |
| H          | -2.849283 | 0.090048    | 2.093571  |
| H          | -3.047682 | 1.707402    | 1.396352  |
| H          | -0.745377 | 3.095619    | 0.988228  |
| N          | -2.108564 | 0.293006    | 0.165475  |
| N          | -0.094216 | 1.412579    | -0.097629 |
| C          | 1.141923  | 1.646816    | -0.808910 |
| C          | 2.206949  | 0.862648    | -0.613209 |
| H          | 3.125776  | 1.072205    | -1.151773 |
| C          | 1.122206  | 2.849679    | -1.700469 |
| C          | 2.236327  | -0.302947   | 0.312522  |
| O          | 1.368605  | -0.591571   | 1.112655  |
| O          | 3.358454  | -0.994968   | 0.151091  |
| C          | 2.089871  | 3.004226    | -2.180512 |
| H          | 0.352066  | 2.739907    | -2.473251 |
| C          | 3.520104  | -2.144361   | 0.996722  |
| H          | 3.505228  | -1.839943   | 2.044628  |
| H          | 2.715655  | -2.859208   | 0.810226  |
| H          | 4.485164  | -2.567505   | 0.727089  |
| H          | 0.871365  | 3.746304    | -1.121449 |

**Mibd-3-H<sub>2</sub>**

|            |           |             |           |
|------------|-----------|-------------|-----------|
| E(ele)     | -         | -822.794559 |           |
| E(ele+zpe) | -         | -822.436903 |           |
| H          | -         | -822.418084 |           |
| G          | -         | -822.484123 |           |
| C          | 0.083044  | -0.526782   | 2.313177  |
| C          | -1.007481 | 0.159947    | 0.191985  |
| C          | -1.077343 | -2.156251   | 0.878012  |
| C          | -0.932811 | -1.654838   | 2.305411  |
| H          | 1.095600  | -0.930042   | 2.203922  |
| H          | 0.037698  | 0.034981    | 3.249031  |
| H          | -1.813500 | -2.959074   | 0.804787  |
| H          | -0.123296 | -2.509599   | 0.473355  |
| H          | -1.906241 | -1.313153   | 2.673745  |
| H          | -0.583460 | -2.451022   | 2.968154  |
| C          | -1.956166 | 0.743747    | -1.933928 |
| C          | -3.176162 | -0.037877   | -1.579868 |
| C          | -2.482143 | -1.336566   | -0.856556 |
| H          | -2.214598 | 1.651771    | -2.480399 |
| H          | -3.842283 | 0.494800    | -0.939217 |

















```

E(ele)      - -1803.214216
E(ele+zpe) - -1802.681769
H           - -1802.649249
G           - -1802.746134
C           0.581850 -1.052352 -1.900745
H           0.815787 -1.127319 -2.954113
C           -0.142182 1.247742 -2.453113
C           0.223462 0.236787 -1.334974
C           2.299915 1.902883 -2.214392
C           0.925698 2.357409 -2.629714
H           0.637276 3.233501 -2.03418
H           0.924269 2.686663 -3.672904
H           -0.212470 0.674308 -3.380209
C           3.170903 2.139189 -2.815745
C           2.405714 1.177202 -1.094559
O           1.242611 0.856179 -0.434105
F           -1.093607 0.140162 0.083594
C           0.565728 -2.194969 -1.107404
O           0.178546 -2.222877 0.083218
O           0.948043 -3.350187 -1.726357
C           0.832398 -4.526492 -0.943691
H           1.439442 -4.457196 -0.036384
H           -0.208451 -4.707458 -0.656607
H           1.193114 -5.338590 -1.576741
H           -1.121002 1.711828 -2.296813
C           -2.459028 -0.986205 -0.294686
C           -3.356195 -1.370335 0.709400
C           -2.674942 -1.394965 -1.614752
C           -4.445294 -2.179595 0.399246
H           -3.210671 -1.032241 1.732000
C           -3.767473 -2.207475 -1.916421
H           -1.979817 -1.104896 -2.396570
C           -4.649008 -2.603419 -0.913791
H           -5.134288 -2.477087 1.184247
H           -3.924336 -2.532570 -2.940613
H           -5.497839 -3.236750 -1.154997
C           -1.880719 1.805712 0.112067
C           -1.079101 2.951948 0.124256
C           -3.271569 1.951463 0.107070
C           -1.659423 4.221985 0.149353
H           0.002907 2.863105 0.093088
C           -3.849919 3.220953 0.133412
C           -3.915602 1.078419 0.073552
C           -3.047625 4.357614 0.157795
H           -1.023955 5.102912 0.155951
H           -4.931846 3.215408 0.129138
H           -3.499231 5.345284 0.176141
C           -0.518062 -0.091385 1.805346
C           -0.665579 -1.320958 2.458711
C           0.069935 0.979414 2.485842
C           -0.257478 -1.459396 3.782160
H           -1.063921 -2.174414 1.923525
C           0.499970 0.626674 3.801438
H           0.215090 1.934401 1.996323
C           0.329245 -0.389966 4.456140
H           -0.379691 -2.417984 4.277652
H           0.970449 1.662997 4.309796
H           0.661327 -0.507671 5.483748
C           3.621990 0.626825 -0.468021
C           3.514589 -0.492117 0.367636
C           4.880410 1.198306 -0.693401
C           4.656889 -1.040473 0.946397
H           2.534715 -0.928048 0.548588
C           6.018063 0.645350 -0.114781
H           4.963634 2.088914 -1.311256
C           5.909536 -0.477650 0.706778
H           4.566727 -1.913247 1.587209
H           6.989642 1.097376 -0.294106
H           6.797810 -0.906699 1.161956

```

```

γ6b
E(ele)      - -767.272485
E(ele+zpe) - -767.017806
H           - -767.001935
G           - -767.061098
C           -2.508527 0.775034 -0.216190
H           -3.366927 1.431877 -0.285287
C           -1.000750 2.770476 -0.509388
C           -1.277174 1.308385 -0.309473
C           1.207754 2.269362 0.481738
C           0.066363 3.246077 0.480805
H           -0.362167 3.342627 1.487657
H           0.417051 4.242488 0.191226
H           2.183677 2.583401 0.833884
H           -0.616812 2.901946 -1.530097
C           1.042397 1.004420 0.077264
O           -0.194471 0.500732 -0.278027
H           -1.930248 3.337087 -0.421176
C           -2.778402 -0.657927 -0.022667
O           -1.971162 -1.555619 0.078464
O           -4.112255 -0.872582 0.039015
C           -4.409669 -2.230532 0.233554
H           -4.084856 -2.615396 1.168341
H           -4.146183 -2.850149 -0.594369
H           -5.588409 -2.223851 0.270396
C           2.069761 -0.055435 0.013982
C           1.679759 -1.400891 0.014239
C           3.431798 0.264927 -0.038725
C           2.646280 -2.404042 -0.017305
H           0.622384 -1.650049 0.043702
C           4.390932 -0.741231 -0.066588
H           3.744212 1.304695 -0.079134
C           4.001090 -2.080891 -0.053962
H           2.335053 -3.444717 -0.012777
H           5.444258 -0.479650 -0.110902
H           4.750412 -2.866950 -0.081286

```

```

Pph-γ-ts6b2
E(ele)      - -1803.213672
E(ele+zpe) - -1802.681250
H           - -1802.649576
G           - -1802.743774
C           -0.636846 1.022776 -1.884860
H           -0.646607 1.168546 -2.956143
C           0.103369 -1.259762 -2.454062
C           -0.284167 -0.261495 -1.336194
C           -2.278097 -2.047387 -2.141668
C           -0.886938 -2.443337 -2.555767
H           -0.539822 -3.265052 -1.914796
H           -0.875997 -2.829577 -3.579126
H           0.079994 -0.702661 -3.393599
H           -3.142921 -2.355648 -2.718576
C           -2.407560 -1.283346 -1.050704
O           -1.253514 -0.874696 -0.415812
F           1.124803 -0.138465 0.113379
C           -0.816703 2.125097 -1.044889
O           -0.660091 2.101195 0.191689
O           -1.134970 3.291583 -1.675882
O           -1.260208 4.423480 -0.831311
H           -2.035041 4.265015 -0.075592
H           -0.314050 4.641139 -0.325533
H           -1.536017 5.251723 -1.485393
H           1.121271 -1.045632 -2.346260
C           2.247112 1.243075 -0.214645
C           2.904077 1.926813 0.814355
C           2.510432 1.575396 -1.549362
C           3.798528 2.949271 0.509100
H           2.722674 1.661167 1.851441
C           3.404961 2.601910 -1.847058
H           2.014560 1.042318 -2.354250
C           4.044231 3.292785 -0.820181
H           4.303645 3.477342 1.312385
H           3.598204 2.860599 -2.883809
H           4.738397 4.094834 -1.054409
C           2.173114 -1.629842 -0.073454
C           1.558484 -2.890480 -0.094039
C           3.560035 -1.544882 -0.219635
C           2.318968 -4.049301 -0.231666
H           0.477565 -2.961870 0.010311
C           4.320812 -2.704116 -0.379898
H           4.052702 -0.576575 -0.213245

```









|   |           |           |           |   |          |           |          |   |           |              |           |           |           |           |           |
|---|-----------|-----------|-----------|---|----------|-----------|----------|---|-----------|--------------|-----------|-----------|-----------|-----------|-----------|
| H | 1.182050  | 4.430970  | 2.690089  | C | 3.045846 | -3.495433 | 1.439178 | G | -         | -1026.652125 | C         | -5.861991 | 0.081744  | -0.802536 |           |
| C | 6.622325  | 5.262875  | 0.100278  | C | 4.524829 | -0.215036 | 2.856756 | C | -0.693038 | 0.434418     | -0.040105 | H         | -0.223161 | 0.202172  | 0.223434  |
| H | 0.007917  | 5.197023  | -0.803507 | C | 3.161121 | 0.789282  | 1.512707 | C | 0.548066  | 0.105688     | 0.828443  | H         | -6.117547 | 0.984513  | -1.366014 |
| H | 0.050216  | 5.796125  | 0.866401  | C | 4.979144 | -1.442572 | 3.327651 | H | 0.917391  | 0.893417     | 1.483896  | H         | -6.406419 | -0.751619 | -1.257838 |
| H | 1.508739  | 5.858977  | -0.141788 | H | 4.783527 | -3.582288 | 3.813199 | H | 0.491305  | -0.840712    | 1.365174  | C         | 2.296829  | -0.524341 | 1.656248  |
| C | 0.454131  | -2.848964 | -1.543536 | H | 4.928388 | 0.707606  | 3.262586 | C | 1.226075  | 0.023315     | -0.511679 | F         | 1.128781  | -0.085392 | 2.206843  |
| F | -0.381081 | -2.191583 | -2.379360 | H | 5.742157 | -1.484563 | 4.099161 | C | 2.455730  | -0.216227    | -0.971421 | F         | 3.159179  | 0.506381  | 0.796454  |
| F | -0.211623 | -3.957248 | -1.148031 |   |          |           |          | H | 6.682775  | -0.205634    | -2.030476 | F         | 2.735696  | -1.510042 | 2.440770  |
| F | 1.495576  | -3.253760 | -2.276242 |   |          |           |          | O | 0.103100  | 0.296804     | -1.244573 | C         | 3.485817  | -1.162135 | -0.444994 |
| C | 1.958756  | -2.624073 | 0.456046  |   |          |           |          | C | 3.507753  | -0.493443    | 0.011454  | C         | 3.922334  | -2.465646 | -0.675543 |
| C | 1.771771  | -3.858428 | 1.082185  |   |          |           |          | C | 0.351704  | -0.537452    | 1.216427  | C         | 4.319945  | -0.098434 | -0.795143 |
| C | 3.153214  | -1.934131 | 0.644057  |   |          |           |          | O | 4.679843  | -0.699568    | -0.580097 | C         | 5.163807  | -2.705209 | -1.259136 |
| C | 2.769877  | -4.393580 | 1.887812  |   |          |           |          | C | 5.779664  | -0.977767    | 0.308279  | H         | 2.357002  | -3.274538 | -0.391320 |
| H | 0.836436  | -4.395622 | 0.954101  |   |          |           |          | H | 6.655284  | -1.103121    | -0.327110 | C         | 5.561248  | -0.395112 | -1.179413 |
| C | 4.151447  | -2.469727 | 1.455630  |   |          |           |          | H | 5.922396  | -0.148537    | 1.005044  | H         | 3.999572  | 0.925736  | -0.619692 |
| C | 3.266608  | -0.968285 | 0.162012  |   |          |           |          | H | 5.579356  | -1.890276    | 0.874797  | C         | 9.896771  | -1.639981 | -1.614544 |
| C | 3.962594  | -3.699111 | 2.079850  |   |          |           |          | C | -1.866520 | -0.506764    | 0.000237  | H         | 5.498989  | -3.726480 | -1.435734 |
| H | 2.612783  | -5.350844 | 2.373632  |   |          |           |          | H | -2.440816 | -0.849036    | 1.225961  | H         | 6.196290  | 0.502523  | -1.563821 |
| H | 5.078548  | -1.922579 | 1.603144  |   |          |           |          | H | -2.390367 | -1.021602    | -1.185555 | H         | 6.954466  | -1.823489 | -2.027521 |
| H | 4.738332  | -4.114918 | 2.716480  |   |          |           |          | H | -1.918556 | -0.587613    | -0.942502 |           |           |           |           |

### IPr-Y-Is4c2' (transition state involving release of IPr)

|            |              |           |           |   |           |           |           |   |               |           |           |   |           |           |           |
|------------|--------------|-----------|-----------|---|-----------|-----------|-----------|---|---------------|-----------|-----------|---|-----------|-----------|-----------|
| E(ele)     | -2186.398999 |           |           |   |           |           |           |   |               |           |           |   |           |           |           |
| E(ele+spe) | -2185.594999 |           |           |   |           |           |           |   |               |           |           |   |           |           |           |
| H          | -2185.547841 |           |           |   |           |           |           |   |               |           |           |   |           |           |           |
| G          | -2185.675390 |           |           |   |           |           |           |   |               |           |           |   |           |           |           |
| C          | -2.300077    | 0.220782  | -2.215087 | H | 0.928358  | 2.418698  | 1.214537  | C | -1.129966     | 1.895336  | 0.059593  | C | -2.158898 | 2.765832  | 0.503821  |
| C          | -1.507300    | 1.386839  | -2.458430 | C | 0.604838  | 0.334154  | 0.857459  | F | -0.081353     | 2.724873  | -0.036075 | C | -3.037785 | 1.771856  | 0.079864  |
| O          | -0.661050    | 0.302231  | -0.699096 | O | -0.112871 | 1.457854  | 2.880727  | F | -0.062669     | -2.220803 | 0.079784  | H | -1.034901 | 0.804880  | 0.132979  |
| H          | -3.196506    | -0.036860 | -2.695729 | O | -0.633447 | 0.489683  | 3.427537  | C | -0.488075     | 1.228477  | -0.199152 | H | -2.273806 | 3.836924  | 0.552838  |
| H          | -1.559752    | 2.168348  | -3.199602 | O | -0.055579 | 2.668274  | 3.514801  | C | -0.402043     | 2.681567  | 1.815434  | H | -4.080750 | 1.776232  | 0.954164  |
| N          | -1.772010    | -0.334753 | -1.107878 | N | -0.109392 | 1.972446  | 5.471164  | C | -0.026043     | 2.681567  | 1.815434  | N | -0.916291 | 2.195594  | 0.192232  |
| N          | -0.502769    | 1.371363  | -1.506814 | H | -0.494629 | 3.699116  | 5.185877  | C | -0.268762     | 1.972446  | 5.471164  | N | -2.368483 | 0.560344  | 0.456780  |
| N          | -2.440597    | -1.469100 | -0.496433 | H | -1.681526 | 2.417537  | 4.783753  | C | -3.982610     | -1.969351 | 2.219394  | C | -0.129573 | 2.961461  | -0.428485 |
| C          | 0.325718     | 2.520568  | -1.282204 | H | 1.962631  | -1.136733 | 0.517713  | H | -3.891183     | -2.282415 | -2.066564 | C | -2.967526 | -0.703841 | 0.747557  |
| C          | 0.010293     | 0.859303  | 1.606301  | C | 1.685339  | 0.157388  | -0.040869 | H | -4.917481     | -2.889876 | 0.110485  | H | -2.185592 | 2.225775  | 0.819222  |
| C          | 0.483562     | -1.531462 | 0.743757  | C | -3.089182 | -1.150551 | 1.132035  | G | -2.185.675079 |           |           | G | -2.185592 | 2.225775  | 0.819222  |
| H          | 0.342169     | -1.803414 | 1.786497  | C | -2.466876 | -2.925175 | -0.469583 |   |               |           |           |   |           |           |           |
| H          | -0.051398    | -2.220895 | 0.089392  | C | -3.632475 | -2.134974 | 1.951610  |   |               |           |           |   |           |           |           |
| O          | 0.398430     | 1.870704  | 1.530471  | C | -0.043901 | -3.865369 | 0.389632  |   |               |           |           |   |           |           |           |
| C          | 0.253064     | -0.027058 | 0.466168  | C | -3.611139 | -3.478158 | 1.592832  |   |               |           |           |   |           |           |           |
| C          | -0.514863    | 0.480043  | -2.824004 | H | -4.083163 | -1.849592 | 2.899649  |   |               |           |           |   |           |           |           |
| O          | -0.993058    | -0.701387 | 3.105702  | H | -3.040102 | -4.914317 | 0.107355  |   |               |           |           |   |           |           |           |
| O          | -0.504183    | 1.408366  | 3.783371  | H | -4.043542 | -4.226620 | 2.254536  |   |               |           |           |   |           |           |           |
| C          | -1.014088    | 1.024248  | 5.044218  | C | -0.325259 | 3.359036  | -1.078420 |   |               |           |           |   |           |           |           |
| O          | -0.506847    | 0.132806  | 5.422699  | H | 1.348541  | 2.098922  | -2.381896 |   |               |           |           |   |           |           |           |
| O          | -0.835611    | 1.870401  | 5.710806  | C | 0.510072  | 4.476208  | -1.135926 |   |               |           |           |   |           |           |           |
| H          | -2.087737    | 0.811641  | 4.998423  | C | 2.143989  | 3.246081  | -2.413790 |   |               |           |           |   |           |           |           |
| H          | 1.930878     | -1.253322 | 0.290662  | C | 1.730620  | 4.421124  | -1.799449 |   |               |           |           |   |           |           |           |
| O          | 1.627873     | 0.085721  | -0.085673 | C | 0.204880  | 5.397464  | -0.649492 |   |               |           |           |   |           |           |           |
| C          | -3.222749    | -1.248564 | 0.651284  | H | 3.102642  | 3.217371  | -2.922055 |   |               |           |           |   |           |           |           |
| C          | -2.313527    | -2.171351 | -1.121682 | H | 2.367027  | 5.300466  | -1.831343 |   |               |           |           |   |           |           |           |
| C          | -3.863236    | -2.365427 | 1.190705  | H | -1.880841 | -3.391415 | -1.792542 |   |               |           |           |   |           |           |           |
| O          | -2.992248    | -3.792455 | -0.546630 | H | -1.217321 | -2.565469 | -2.235343 |   |               |           |           |   |           |           |           |
| C          | -3.751195    | -3.619576 | 0.602776  | H | -3.004014 | -3.785279 | -2.762163 |   |               |           |           |   |           |           |           |
| H          | -4.456413    | -2.249865 | 2.090577  | H | -3.703782 | -2.962188 | -2.938136 |   |               |           |           |   |           |           |           |
| H          | -2.912717    | -4.776042 | -1.005186 | H | -2.587249 | -4.093356 | -3.726579 |   |               |           |           |   |           |           |           |
| H          | -4.260846    | -4.692823 | -1.046939 | H | -3.580436 | -4.625176 | -2.358434 |   |               |           |           |   |           |           |           |
| O          | -0.253355    | 3.534564  | -0.440508 | C | -0.913706 | -4.567313 | -1.613151 |   |               |           |           |   |           |           |           |
| C          | 1.610595     | 2.601517  | -1.772513 | H | -1.496171 | -4.349900 | -0.864785 |   |               |           |           |   |           |           |           |
| C          | 0.526876     | 4.662754  | -0.189712 | H | -1.444317 | -5.475796 | -1.309699 |   |               |           |           |   |           |           |           |
| C          | 2.344836     | 3.756143  | -1.492674 | O | -0.412215 | -4.783168 | -2.562028 |   |               |           |           |   |           |           |           |
| C          | 1.812924     | 0.770866  | -0.707100 | C | 1.786370  | 0.823997  | -3.081071 |   |               |           |           |   |           |           |           |
| H          | 0.121788     | 5.466030  | 0.418273  | H | 1.254382  | -0.011230 | -2.616167 |   |               |           |           |   |           |           |           |
| H          | 3.247203     | 0.860203  | -1.662998 | C | 3.283905  | 0.551792  | -2.926171 |   |               |           |           |   |           |           |           |
| C          | 2.404562     | 5.656736  | -0.496689 | C | 3.888594  | 1.298763  | -3.451499 |   |               |           |           |   |           |           |           |
| O          | -1.490017    | -2.922795 | -2.381828 | H | 3.570914  | 0.544231  | -1.871137 |   |               |           |           |   |           |           |           |
| H          | -0.862123    | -2.039564 | -2.536991 | H | 3.526710  | -0.254591 | -3.352717 |   |               |           |           |   |           |           |           |
| C          | -2.407852    | -3.074942 | -3.603220 | C | 1.404725  | 0.882002  | -4.566680 |   |               |           |           |   |           |           |           |
| C          | -3.053710    | -2.201743 | -3.739515 | H | 1.909981  | 1.720466  | -5.059402 |   |               |           |           |   |           |           |           |
| H          | -1.815414    | -3.207649 | -4.513082 | H | 1.700662  | -0.041200 | -5.075428 |   |               |           |           |   |           |           |           |
| H          | -3.055575    | -3.951043 | -3.487198 | O | 0.326509  | 1.014322  | -4.701733 |   |               |           |           |   |           |           |           |
| O          | -1.558085    | -4.132155 | -2.737271 | C | -3.190292 | 0.325466  | 1.500320  |   |               |           |           |   |           |           |           |
| O          | 0.049552     | -4.097340 | -1.362294 | H | -2.196310 | 0.771250  | 1.376212  |   |               |           |           |   |           |           |           |
| H          | -1.118704    | -5.071040 | -2.270640 | H | -4.181490 | 1.049403  | 0.573790  |   |               |           |           |   |           |           |           |
| H          | 0.125829     | -4.153383 | -3.127508 | H | -3.884397 | 1.013999  | -0.478667 |   |               |           |           |   |           |           |           |
| C          | 2.165175     | 1.522414  | -2.683363 | H | -5.177063 | 0.593958  | 0.662298  |   |               |           |           |   |           |           |           |
| H          | 1.602280     | 0.603541  | -2.500502 | H | -4.260915 | -2.102673 | 0.867489  |   |               |           |           |   |           |           |           |
| C          | 3.634967     | 1.213950  | -2.392232 | H | -3.606373 | 0.563484  | 2.951793  |   |               |           |           |   |           |           |           |
| H          | 4.284310     | 0.058690  | -2.662998 | H | -2.945648 | 0.045560  | 3.648612  |   |               |           |           |   |           |           |           |
| C          | 3.775821     | 0.963691  | -1.337093 | H | -3.538958 | 1.635353  | 3.165898  |   |               |           |           |   |           |           |           |
| H          | 3.958601     | 0.357953  | -2.991420 | H | -4.646232 | 0.258162  | 3.123418  |   |               |           |           |   |           |           |           |
| C          | 1.969885     | 1.932022  | -4.149272 | H | -1.672193 | 3.344233  | -0.381277 |   |               |           |           |   |           |           |           |
| C          | 2.513235     | 2.858068  | -4.368709 | H | -1.936606 | 2.466452  | -0.075964 |   |               |           |           |   |           |           |           |
| H          | 2.344056     | 1.150659  | -4.818549 | H | -1.665639 | 4.283888  | 0.884787  |   |               |           |           |   |           |           |           |
| O          | 0.912672     | 2.102432  | -4.380725 | H | -0.878938 | 3.979085  | 1.580180  |   |               |           |           |   |           |           |           |
| C          | -3.433413    | 0.138245  | 1.239079  | H | -1.543921 | 5.347645  | 0.651533  |   |               |           |           |   |           |           |           |
| H          | -2.464836    | 0.653391  | 1.237093  | H | -2.628405 | 4.176165  | 1.397122  |   |               |           |           |   |           |           |           |
| H          | -4.429669    | 0.942217  | 0.387265  | C | -2.746021 | 3.928423  | -1.356533 |   |               |           |           |   |           |           |           |
| H          | -4.091239    | 1.090814  | -0.642458 | H | -2.819887 | 3.293478  | -2.244784 |   |               |           |           |   |           |           |           |
| H          | -5.401588    | 0.436198  | 0.356751  | H | -3.727061 | 3.946952  | -0.869687 |   |               |           |           |   |           |           |           |
| C          | -4.579003    | 1.933031  | 0.831818  | H | -2.508622 | 4.946409  | -1.686473 |   |               |           |           |   |           |           |           |

|   |          |           |           |
|---|----------|-----------|-----------|
| C | 5.257457 | -1.550432 | -1.435407 |
| H | 4.206968 | 0.124011  | -0.594108 |
| C | 5.265151 | -2.928983 | -1.636913 |
| H | 4.224396 | -4.779870 | -1.288352 |
| H | 6.066686 | -0.938104 | -1.821383 |
| H | 6.080930 | -3.395873 | -2.180471 |

**Y-Sc**

|            |               |           |           |
|------------|---------------|-----------|-----------|
| E(ele)     | =-1026.844345 |           |           |
| E(ele+zpe) | =-1026.619735 |           |           |
| H          | =-1026.602270 |           |           |
| G          | =-1026.665528 |           |           |
| C          | -1.708644     | 0.090044  | 0.711650  |
| C          | 0.135150      | 1.125078  | 1.631418  |
| C          | -1.318384     | 0.773096  | 1.784612  |
| C          | 0.455438      | 0.540852  | 0.222222  |
| H          | 0.312397      | 2.205373  | 1.675756  |
| C          | -3.064005     | -0.458122 | 0.452907  |
| O          | -3.981791     | -0.331905 | 1.229023  |
| O          | -3.140419     | -1.092966 | -0.717222 |
| C          | -4.426951     | -1.634077 | -1.029058 |
| H          | -4.718404     | -2.369716 | -0.275929 |
| H          | -5.172075     | -0.836104 | -1.061488 |
| H          | -4.216635     | -2.101082 | -2.005958 |
| H          | 0.755133      | 0.654478  | 2.401377  |
| O          | -0.735954     | -0.115331 | -0.231615 |
| C          | 0.672306      | 1.684732  | -0.779123 |
| C          | 1.629519      | -0.419641 | 0.185196  |
| C          | 2.828748      | -0.078971 | 0.816996  |
| C          | 1.528637      | -1.633679 | -0.494854 |
| C          | 3.915022      | -0.948184 | 0.774937  |
| H          | 2.920035      | 0.869923  | 1.340350  |
| C          | 2.616511      | -2.504591 | -0.530007 |
| H          | 0.596785      | -1.892276 | -0.986529 |
| C          | 3.810032      | -2.165231 | 0.102592  |
| H          | 4.842515      | -0.674942 | 1.269308  |
| H          | 2.528536      | -3.451088 | -1.055340 |
| H          | 4.656226      | -2.845361 | 0.073425  |
| F          | -0.388164     | 2.507749  | -0.800954 |
| F          | 1.743011      | 2.425110  | -0.437971 |
| F          | 0.864136      | 1.235678  | -2.021119 |
| H          | -1.950315     | 1.017839  | 2.626996  |



E(ele) - -1371.987929
E(ele+zpe) - -1371.573796
H - -1371.549360
G - -1371.627090
C -0.449723 1.409007 -0.969257
C -0.541791 -0.805859 -1.263069
H -1.127861 -0.290485 -2.026499
H -0.221828 -1.757133 -1.685337
H -0.501574 1.171093 -1.391986
C 0.602529 0.074124 -0.872012
C 1.271223 2.574094 -0.561414
O 2.371960 2.587696 -0.041945
O 0.607357 3.696538 -0.857625
C 1.254117 4.916832 -0.491013
H 2.218759 5.000674 -0.996522
H 0.578980 5.708939 -0.809384
H 1.407763 4.949099 0.589816
C 3.084254 -0.137798 -0.995200
C 1.898779 -0.191381 1.210139
C 1.793513 -2.086808 -0.359960
C 4.288474 -0.550931 -0.117268
H 3.057278 0.934330 -1.157852
H 3.065452 -0.558153 -1.956854
C 3.037341 -1.005796 1.856449
H 0.907747 -0.439746 1.602582
H 2.094790 0.877903 1.235584
H 0.928699 -2.390472 0.242023
H 1.635224 -2.346541 -1.407628
C 3.159050 -2.622381 0.134503
H 4.659559 0.514611 -0.444827
H 5.099594 -0.916781 -0.754443
H 2.632420 -1.820586 2.463783
H 3.629566 -0.358153 2.509801
H 2.993815 -3.467626 0.808119
H 3.768238 -2.977864 -0.703263
N 1.820239 -0.564807 -0.275662
C 3.914274 -1.590138 0.839974
C -1.427284 -1.119373 0.046354
O -0.683359 -1.548444 1.059695
C -2.388311 -2.247820 -0.404806
F -1.708285 -3.385578 -0.657915
F -3.060926 -1.963222 -1.556348
F -3.308137 -2.531180 0.521148
C -2.253810 0.152254 0.361113
C -3.080411 0.801772 -0.563962
C -2.123275 -0.696582 1.638485
C -3.750762 1.974090 -0.219362
H -3.217530 0.391810 -0.561372
C -2.790379 1.871502 1.986030
H -1.495278 0.162094 2.345183
C -3.604260 2.516733 1.057391
H -4.392759 2.461343 -0.948549
H -2.679233 2.280471 2.987083
H -4.127993 3.430157 1.325760

E(ele+zpe) - -1026.600016
H - -1026.582191
G - -1026.646867
C -0.740076 0.565753 0.218847
C -0.027329 0.800179 1.572633
H 0.008976 1.836609 1.914651
H -0.353491 0.136152 2.374735
C -1.180047 0.337711 0.798660
C 2.466673 0.104671 1.069577
H 2.831141 0.287364 2.073275
O 0.514032 0.178009 -0.384973
C 3.402107 -0.409295 0.059484
C 3.135020 -0.685723 -1.088127
O 4.638111 -0.552432 0.584153
H 5.620148 -1.065171 -0.314497
H 6.550528 -1.092419 0.251445
H 5.342391 -2.068030 -0.648201
H 5.716073 -0.413533 -1.186168
C -1.777264 -0.524355 0.141196
C -2.882058 -0.513954 0.996117
C -1.629251 -1.543502 -0.799570
C -3.338383 -1.521961 0.905836
C -2.996899 0.280116 1.730375
C -2.588189 -2.550837 -0.884682
C -0.759234 -1.547825 -1.448896
C -3.692283 -2.541223 -0.034998
H -4.696316 -1.512368 1.571349
H -2.468971 -3.344702 -1.615715
H -4.437827 -3.328051 -0.102474
C -1.209898 -1.857244 -0.448829
F -0.247644 2.789967 -0.433720
F -1.566516 1.657403 -1.718853
F -2.268146 2.361105 0.210191

C -4.210452 -0.957833 1.688809
H -4.863117 0.575038 -1.173707
H -5.328570 1.155136 0.427527
H -3.949325 -2.718494 -0.137110
H -4.446557 -1.754486 -1.530814
H -4.449863 -1.944565 2.096329
H -4.714852 -0.211695 2.310985
N -2.253304 -0.127806 0.381406
N -4.752381 -0.856483 0.335332
C 0.161683 2.403678 -0.489093
O 1.263078 2.748850 -0.147007
O -0.872866 3.261387 -0.637596
H -1.022809 1.027976 -1.591730
O -0.601802 4.605531 -0.243213
H -1.522485 5.160225 -0.422445
H -0.329924 4.638580 0.814791
H 0.217709 5.018908 -0.835751
O 0.810255 0.209869 -1.226514
C 1.410146 -2.020207 -0.908935
F 1.773681 -2.987368 -0.045000
F 0.239581 -2.418179 -1.455147
F 2.308851 -2.003812 -1.897623
C 2.659748 -0.254004 0.295955
C 3.189520 -0.834000 1.450775
C 3.430759 0.657523 -0.425614
C 4.466923 -0.493460 1.890564
H 2.609386 -1.562687 2.011572
C 4.706109 0.999959 0.015626
H 3.013480 1.111595 -1.316619
C 5.227887 0.427987 1.174372
C 4.865300 -0.948442 2.792996
H 5.292051 1.721018 -0.547096
H 6.222255 0.699002 1.517983

[3 + 2] cycloaddition
Dabco-gts4c2

E(ele) - -1371.959962
E(ele+zpe) - -1371.546828
H - -1371.523124
G - -1371.598214
C -0.339785 1.588007 -0.152404
C 0.016136 -0.327873 1.147917
C -0.946394 0.738611 0.751929
C 0.892970 -0.661620 -0.205855
H 0.727764 0.083503 1.864370
H -0.413423 -1.226000 1.595469
C -3.281246 1.512757 0.813398
C -2.629335 0.162770 -1.094226
C -2.833688 -0.843752 1.139372
C -4.707680 1.243981 0.271983
H -2.846412 2.434348 0.424284
H -3.228196 1.550559 1.904307
C -4.035884 -0.445737 -1.267739
H -1.815134 -0.439626 -1.486790
H -2.573722 1.149634 -1.557251
H -2.314014 -1.693462 0.697519
H -2.502589 -0.720086 2.172527
C -4.368700 -0.974746 1.016856
H -4.913065 1.852584 -0.614338
H -5.451527 1.504842 1.030886
H -3.982460 -1.531480 -1.396516
H -4.514241 -0.028676 -2.159061
H -2.021445 -0.849486
H -4.867844 -0.645147 1.933781
N -2.376518 0.381523 0.390664
N -4.867364 -0.164497 -0.092639
C 0.953864 2.269820 0.170492
O 1.587913 2.159706 1.192981
O 1.326600 3.070069 -0.842064
H -0.304257 2.134120 -0.903952
C 2.597943 3.695690 -0.672435
H 2.775603 4.253727 -1.590924
H 2.580471 4.365610 0.190964
H 3.370075 2.936792 -0.520933
O 0.564190 0.212370 -1.187024
O 0.520534 -2.085097 -0.644957
F 0.782617 -3.019399 0.301449
F -0.811615 -2.210157 -0.903655
F 1.153327 -2.470632 -1.756580
C 2.996699 -0.655167 0.114738
C 3.263017 -0.018999 -0.775356
C 2.923732 -1.254297 1.261262
C 4.631583 0.030435 -0.517269
H 2.837799 0.441165 -1.663030
H -1.781446 1.936933 0.883398
H 2.264779 -1.759874 1.963283
C 5.150985 -0.562555 0.632255
H 5.295909 0.529883 -1.218257
H 4.687057 -1.672419 2.419659
H 6.217579 -0.523357 0.835529

Dabco-gts5c

E(ele) - -1371.972915
E(ele+zpe) - -1371.558318
H - -1371.534183
G - -1371.611038
C -0.298231 0.979306 -0.767191
C 0.172590 -0.705633 0.882991
C -0.827381 0.397545 0.531608
C 1.278252 -0.657020 -0.213137
H 0.633965 -0.555328 1.862939
H +0.266342 -1.714447 0.902330
C -3.170864 1.042617 0.141339
C -2.514344 -1.157675 -0.696493
C -2.679360 -0.734761 1.691127
C -4.608190 0.530745 -0.110030
H -2.778525 1.615784 -0.698143
H -3.075668 1.669237 1.030998
C -3.957323 -1.705975 -0.553325
H -1.761462 -1.936933 -0.588063
H -2.352789 -0.658998 -1.655252
H -2.135975 -1.675203 1.798729
H -2.332874 -0.043749 2.462219

Dabco-gts4c2

E(ele) - -1371.979899
E(ele+zpe) - -1371.562334
H - -1371.538383
G - -1371.614893
C 0.380004 1.538816 -0.667193
C -0.540294 -0.835130 -1.323843
H -0.009951 -0.027818 -0.098566
H -0.159975 -1.544308 -1.789594
H -0.573282 1.849271 -1.080186
C 0.512184 0.172942 -0.552143
C 1.187385 2.668985 -0.245192
C 2.355399 2.695419 0.133873
O 0.486453 3.815540 -0.387679
C 1.180046 0.012579 -0.069260
H 2.060410 5.131969 -0.716059
H 0.475216 5.819822 -0.232499
H 1.517908 4.998306 0.973430
C 2.923481 0.038594 -1.165245
C 2.235024 -0.057616 1.231039
C 1.885441 -1.953062 -0.244469
C 4.306414 -0.313410 -0.574082
C 2.806732 1.108836 -1.304323
H 2.720565 -0.478655 -2.108159
C 3.532135 -0.801663 1.621021
H 1.373729 -0.331570 1.836914
H 2.375712 1.019078 1.232473
H 1.218145 -2.287916 0.547572
H 1.482797 -2.275027 -1.202747
C 3.352242 -2.425810 -0.083245
H 4.748870 0.573489 -0.110386
H 4.977245 -0.650893 -1.370211
H 3.323777 -1.624833 2.311570
H 4.215445 -0.109722 2.121876
H 3.385446 -3.281702 0.596998
H 3.766739 -2.749883 -1.043469
N 1.860333 -0.439227 -0.197772
N 4.198015 -1.358889 0.442864
C -1.390079 -0.924472 -0.066755
O -0.418280 -0.727623 0.895912
C -1.879223 -2.375971 -0.031280
F -0.850271 -3.250796 -0.122370
F -2.538370 -2.666436 1.094555
F -2.699545 -2.663728 -1.066840
C -2.589931 0.016571 0.078349
C -2.713498 0.749136 1.257403
C -3.541980 0.179552 -0.932862
C -3.777185 1.632729 1.429073
H -1.953375 0.619885 2.020636
C -4.603738 1.065636 -0.763028
H -3.458315 -0.384955 -1.858830
H -4.724414 1.794652 0.419838
H -3.862325 2.201594 2.352329
H -5.336705 1.188380 -1.555539
H -5.550126 2.488535 0.550275

g4c

E(ele) - -1026.823978





|   |           |           |           |   |           |           |           |
|---|-----------|-----------|-----------|---|-----------|-----------|-----------|
| C | 0.905775  | -2.700977 | 0.378958  | F | 0.352698  | -0.067575 | 2.852218  |
| C | 1.517894  | -3.891059 | -0.025067 | F | -1.776830 | -0.428044 | 2.754329  |
| C | -0.347776 | -2.756971 | 1.009028  | F | -0.391548 | -2.091996 | 2.676526  |
| C | 0.897789  | -5.115851 | 0.215787  | F | 3.048269  | -2.240632 | -0.604491 |
| H | 2.478428  | -3.867441 | -0.530464 | F | 2.830836  | -1.110575 | -2.442008 |
| C | -0.963271 | -3.981711 | 1.244488  | F | 1.336944  | -2.569701 | -1.878394 |
| H | -0.861195 | -1.639723 | 1.289156  |   |           |           |           |
| C | -0.339302 | -5.163557 | 0.851660  |   |           |           |           |
| H | 1.384538  | -6.033517 | -0.099929 |   |           |           |           |
| H | -1.939692 | -4.003801 | 1.718667  |   |           |           |           |
| H | -0.820939 | -6.119758 | 1.031991  |   |           |           |           |
| C | 3.048050  | -1.396438 | -1.064140 |   |           |           |           |
| C | 2.819070  | -1.252575 | -2.436506 |   |           |           |           |
| C | 4.289664  | -1.861385 | -0.611743 |   |           |           |           |
| C | 3.831996  | -1.552101 | -3.344477 |   |           |           |           |
| H | 1.862661  | -0.883951 | -2.791855 |   |           |           |           |
| C | 5.293882  | -2.162395 | -1.524674 |   |           |           |           |
| H | 4.466011  | -1.992114 | 0.452264  |   |           |           |           |
| C | 5.067447  | -2.002785 | -2.891080 |   |           |           |           |
| H | 3.652601  | -1.429172 | -4.407826 |   |           |           |           |
| H | 6.253758  | -2.523014 | -1.168614 |   |           |           |           |
| H | 5.855074  | -2.234324 | -3.601668 |   |           |           |           |
| C | 2.338478  | -0.553254 | 1.692465  |   |           |           |           |
| C | 1.601894  | -0.809589 | 2.853689  |   |           |           |           |
| C | 3.546870  | 0.147080  | 1.787237  |   |           |           |           |
| C | 2.075756  | -0.389845 | 4.092192  |   |           |           |           |
| H | 0.652506  | -1.330893 | 2.804113  |   |           |           |           |
| C | 4.024957  | 0.543247  | 3.031544  |   |           |           |           |
| H | 4.090915  | 0.410707  | 0.888729  |   |           |           |           |
| C | 3.292371  | 0.279281  | 4.185579  |   |           |           |           |
| H | 1.489527  | -0.589475 | 4.983495  |   |           |           |           |
| H | 4.966462  | 1.080029  | 3.093761  |   |           |           |           |
| H | 3.663060  | 0.603992  | 5.153034  |   |           |           |           |
| C | -2.320498 | -0.045542 | -1.056945 |   |           |           |           |
| O | -2.285624 | 1.143209  | -0.281471 |   |           |           |           |
| C | -1.247970 | 1.420983  | 0.630216  |   |           |           |           |
| O | -0.202759 | 0.508405  | 0.571440  |   |           |           |           |
| C | -2.932617 | 0.470524  | -2.370995 |   |           |           |           |
| F | -2.147292 | 1.381311  | -2.953997 |   |           |           |           |
| F | -3.095431 | -0.539568 | -3.240208 |   |           |           |           |
| F | -4.122753 | 1.035816  | -2.164879 |   |           |           |           |
| C | -1.819312 | 1.206047  | 2.048213  |   |           |           |           |
| F | -2.918897 | 1.942005  | 2.226838  |   |           |           |           |
| F | -2.152314 | -0.080494 | 2.246265  |   |           |           |           |
| F | -0.933654 | 1.532726  | 2.990192  |   |           |           |           |
| C | -3.304926 | -1.055634 | -0.464195 |   |           |           |           |
| C | -3.303319 | -2.391468 | -0.870590 |   |           |           |           |
| C | -4.289264 | -0.618124 | 0.423552  |   |           |           |           |
| C | -4.243074 | -3.285306 | -0.363255 |   |           |           |           |
| H | -2.574889 | -2.747285 | -1.593453 |   |           |           |           |
| C | -5.223968 | -1.512469 | 0.934221  |   |           |           |           |
| H | -4.307840 | 0.423254  | 0.724664  |   |           |           |           |
| C | -5.201005 | -2.849976 | 0.547208  |   |           |           |           |
| H | -4.223171 | -4.322454 | -0.684305 |   |           |           |           |
| H | -5.974120 | -1.159927 | 1.635202  |   |           |           |           |
| H | -5.931219 | -3.547374 | 0.946282  |   |           |           |           |
| C | -0.798926 | 2.862272  | 0.459807  |   |           |           |           |
| C | 0.392161  | 3.262809  | 1.066520  |   |           |           |           |
| C | -1.567262 | 3.774870  | -0.258401 |   |           |           |           |
| C | 0.819440  | 4.579331  | 0.935246  |   |           |           |           |
| H | 1.002697  | 2.532028  | 1.587740  |   |           |           |           |
| C | -1.133904 | 5.091758  | -0.382739 |   |           |           |           |
| H | -2.483209 | 3.444529  | -0.736368 |   |           |           |           |
| C | 0.057834  | 5.495641  | 0.212458  |   |           |           |           |
| H | 1.753779  | 4.887682  | 1.395301  |   |           |           |           |
| H | -1.726372 | 5.800815  | -0.952789 |   |           |           |           |
| H | 0.395907  | 6.522644  | 0.110444  |   |           |           |           |

**Y-sec**

|            |           |              |           |
|------------|-----------|--------------|-----------|
| E(ele)     | -         | -1709.253911 |           |
| E(ele+zpe) | -         | -1709.908419 |           |
| H          | -         | -1709.880953 |           |
| G          | -         | -1709.866771 |           |
| C          | -1.076987 | 2.125602     | -1.293767 |
| H          | -0.817952 | 2.450487     | -2.294638 |
| C          | 0.348761  | 0.073071     | -1.605690 |
| C          | -0.525701 | 1.002161     | -0.815585 |
| C          | 1.397099  | -0.523719    | -0.657115 |
| O          | 0.805133  | 0.587582     | -2.451795 |
| C          | -0.541794 | -0.734290    | 0.751788  |
| H          | -0.690601 | 0.638991     | 0.484898  |
| H          | -0.261037 | -0.746668    | -2.005237 |
| C          | -2.050527 | 2.940583     | -0.544136 |
| O          | -2.651495 | 2.610798     | 0.453478  |
| O          | -2.231956 | 4.131300     | -1.150197 |
| C          | -3.189838 | 4.987132     | -0.527568 |
| H          | -4.171580 | 4.507595     | -0.510483 |
| H          | -2.886022 | 5.214654     | 0.496723  |
| H          | -3.212700 | 5.891542     | -1.133645 |
| O          | 0.736770  | -1.215860    | 0.401121  |
| C          | -0.591336 | -0.825984    | 2.291892  |
| C          | -1.663556 | -1.541309    | 0.118963  |
| C          | -1.454559 | -2.869347    | -0.251655 |
| C          | -2.911716 | -0.939238    | -0.063619 |
| C          | -2.497097 | -3.596547    | -0.821881 |
| C          | -0.479285 | -3.221967    | -0.103498 |
| C          | -3.947869 | -1.673578    | -0.635873 |
| H          | -3.063646 | 0.095051     | 0.240242  |
| C          | -3.741869 | -2.998770    | -1.016617 |
| H          | -2.334826 | -4.629215    | -1.115865 |
| H          | -4.917765 | -1.208118    | -0.783273 |
| H          | -4.551953 | -3.566580    | -1.465321 |
| C          | 2.383876  | 0.499015     | -0.099594 |
| C          | 2.781399  | 1.611135     | -0.845371 |
| C          | 2.933289  | 0.294113     | 1.168280  |
| C          | 3.705297  | 2.514661     | -0.324527 |
| H          | 2.380988  | 1.787974     | -1.839964 |
| C          | 3.857561  | 1.196839     | 1.686576  |
| H          | 2.626724  | -0.568636    | 1.749481  |
| C          | 4.243706  | 2.310764     | 0.943272  |
| H          | 3.999669  | 3.278987     | -0.912030 |
| H          | 4.273744  | 1.030142     | 2.675555  |
| H          | 4.960759  | 3.017332     | 1.350613  |
| C          | 2.165972  | -1.629841    | -1.397095 |

## Acknowledgement

This work is supported by the National Science Council of the Republic of China under Grant NSC 100-2113-M-007-008-MY3. Timm Lankau acknowledges a university research associateship from the National Tsing Hua University.

## References

- (1) Pei, C.-K.; Wu, L.; Lian, Z.; Shi, M. *Org. Biomol. Chem.* **2012**, *10*, 171–80.
- (2) Wang, X.; Fang, T.; Tong, X. *Angew. Chem. Int. Ed.* **2011**, *50*, 5361–4.
- (3) Ashtekar, K. D.; Staples, R. J.; Borhan, B. *Org. Lett.* **2011**, *13*, 5732–5.
- (4) Chen, X.-y.; Wen, M.-w.; Ye, S.; Wang, Z.-x. *Org. Lett.* **2011**, *13*, 1138–41.
